# Supplementary material for: The Water-Energy-Food Nexus Index: A Tool to Support Integrated Resource Planning, Management and Security
Source: Frontiers journal article supplement (doi:10.3389/frwa.2022.825854), 2022-03-10

Figure S.1: Graph of the percentage of people using at least basic drinking water services, with median value for global assessment for sixteen SADC countries (World Bank: WHO/UNICEF Joint Monitoring Programme (JMP) for Water Supply, Sanitation and Hygien

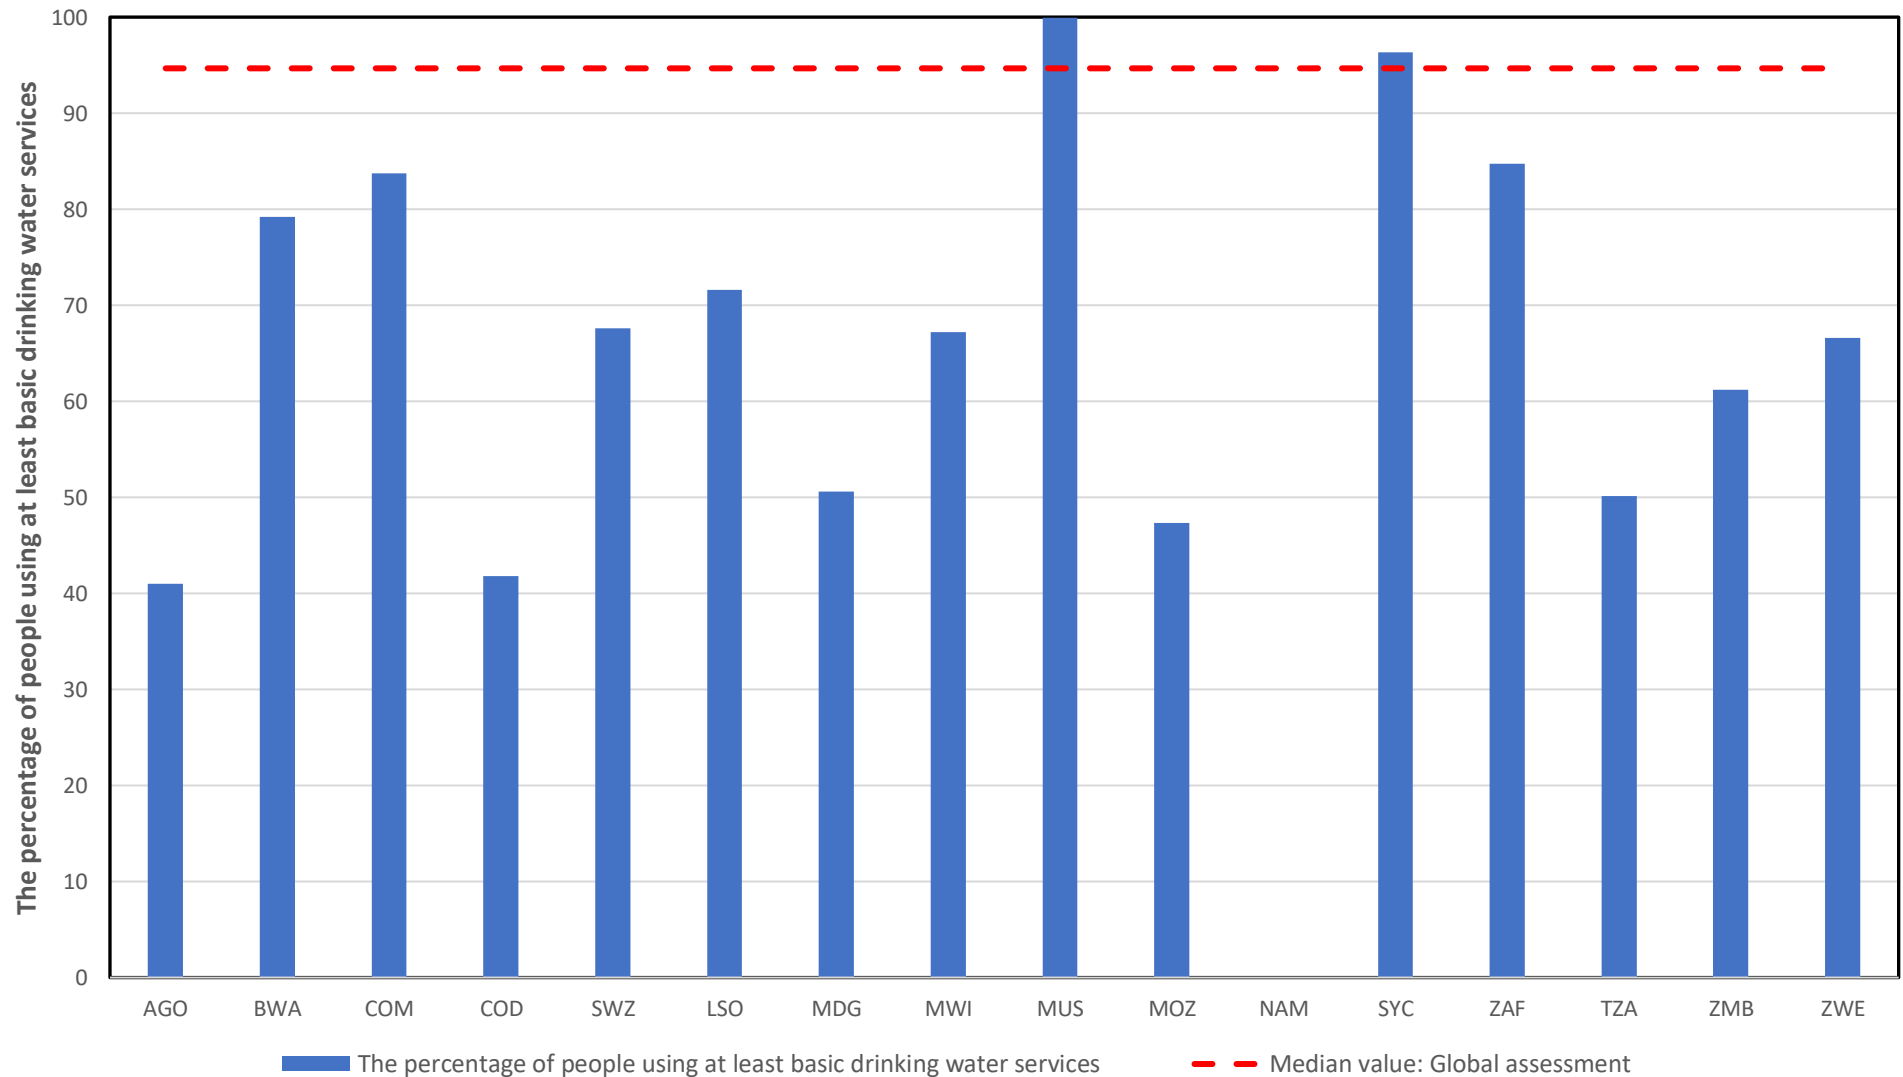

**Figure S.2: Graph of the percentage of people using at least basic sanitation services, with median value for global assessment for sixteen SADC countries (World Bank: World Health Organization and United Nations Children's Fund, Joint Measurement Program)**

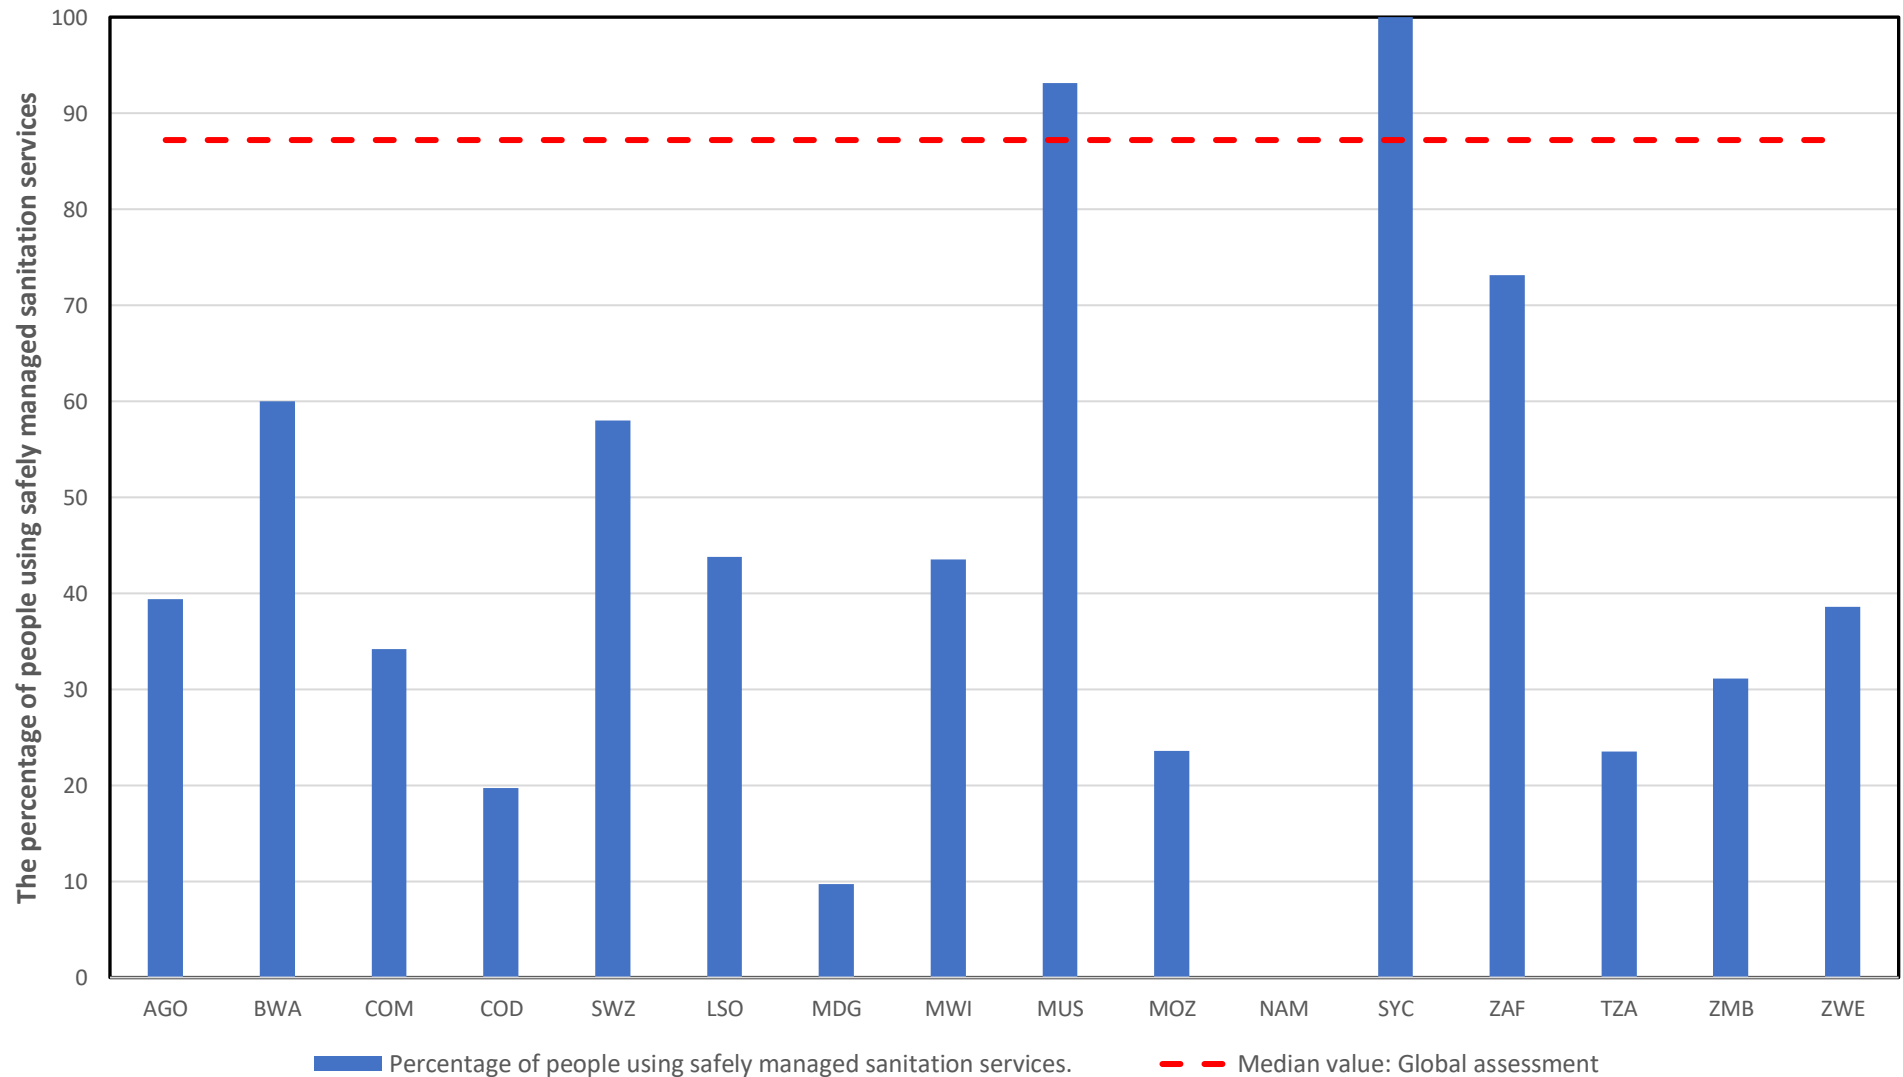

**Figure S.3: Graph of the degree of Integrated Water Resources Management (IWRM) Implementation, with median value for global assessment for sixteen SADC countries (World Bank: IWRM Data Portal, UNEP-DHI – 2017 data)**

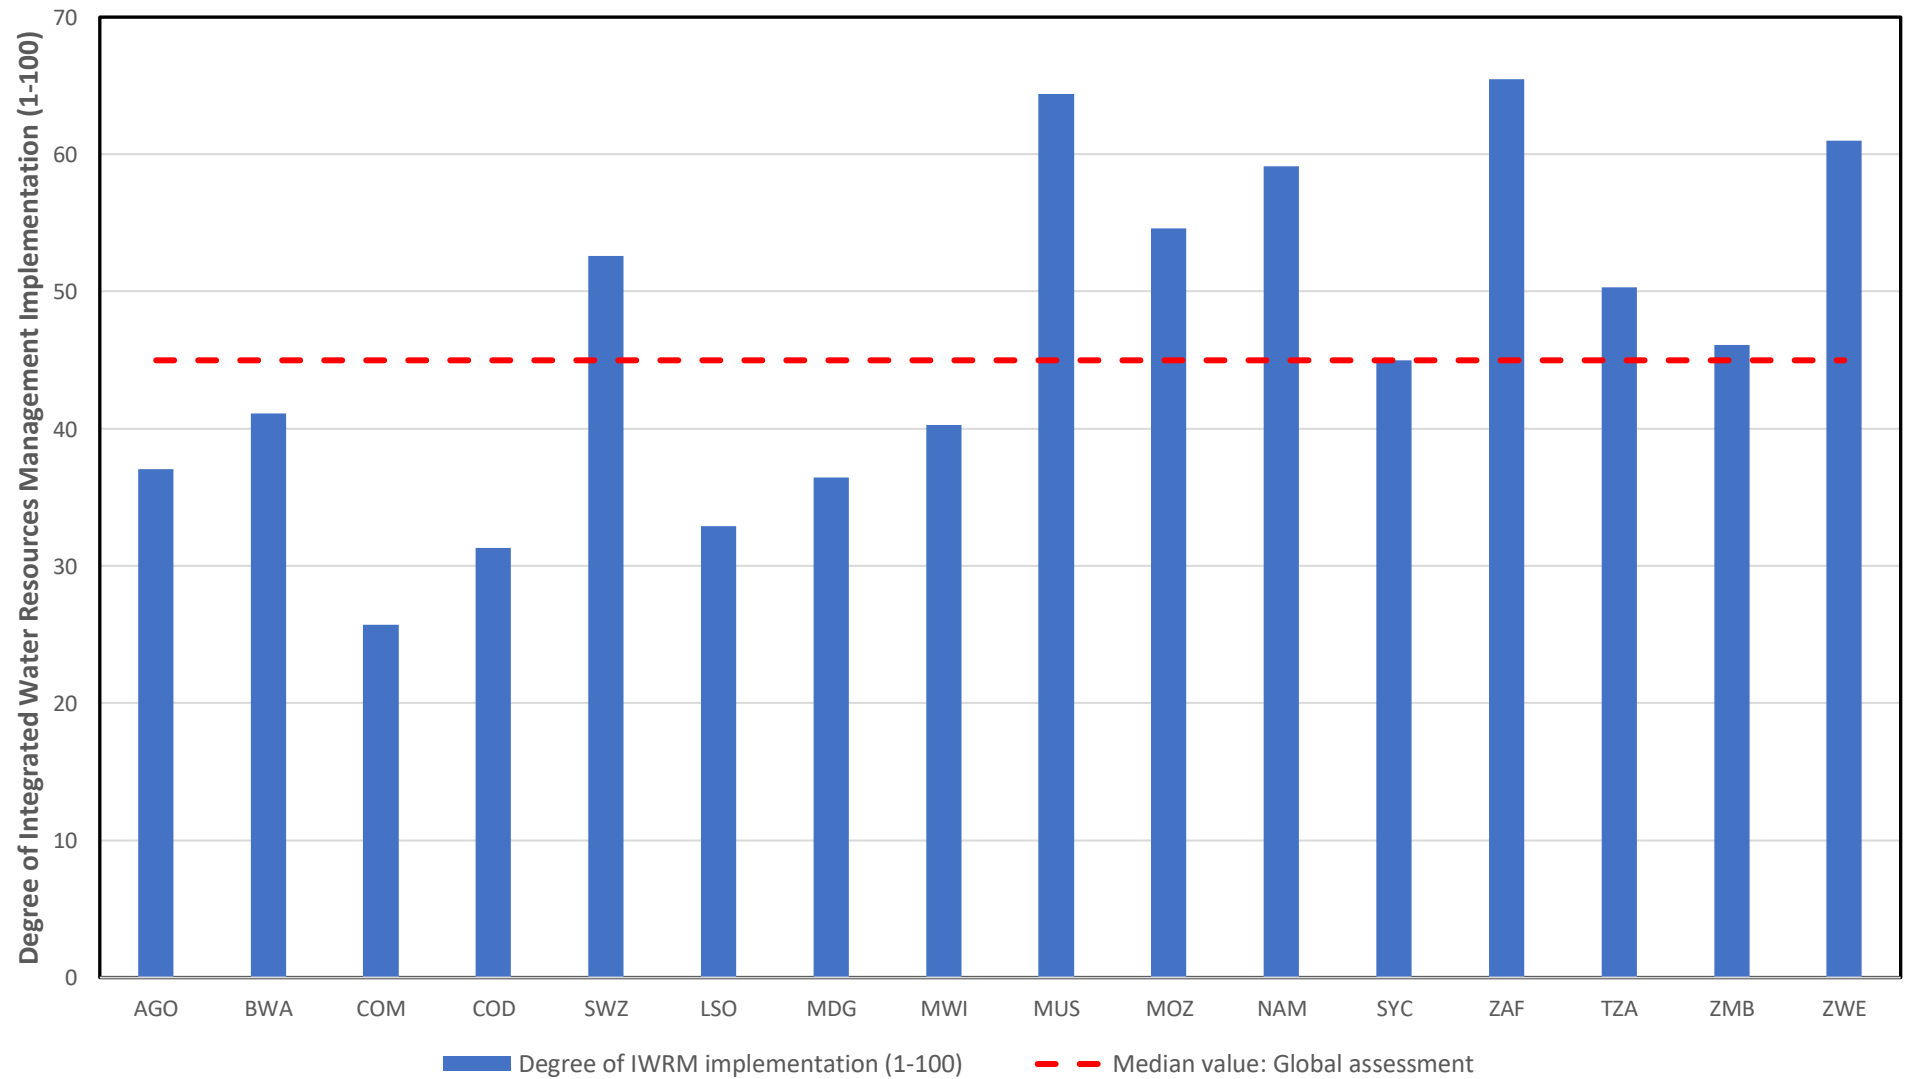

Figure S.4: Graph of the Annual Freshwater Withdrawals, with median value for global assessment for sixteen SADC countries (World Bank: Food and Agriculture Organization, AQUASTAT data – 2002-2014 data)

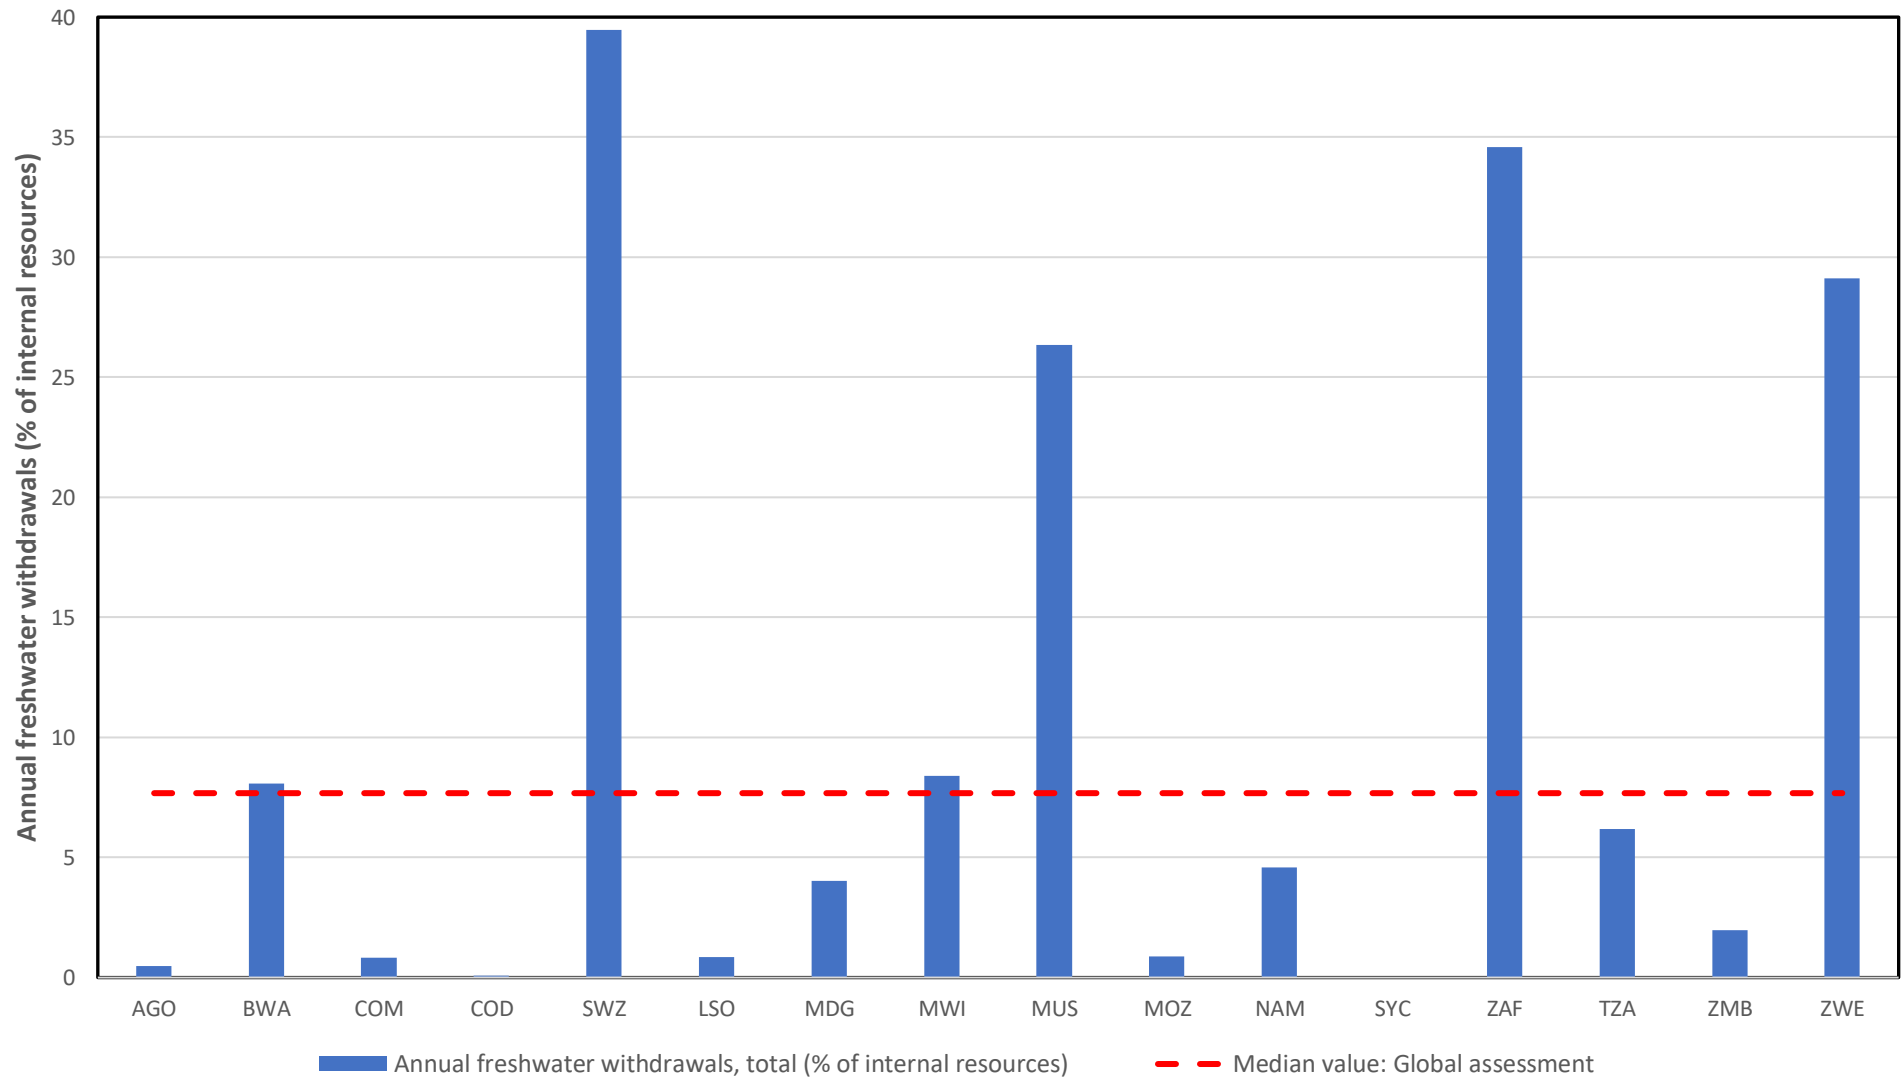

**Figure S.5: Graph of the Renewable Internal Freshwater Resources, with median value for global assessment for sixteen SADC countries (World Bank: Food and Agriculture Organization, AQUASTAT data – 2014 data)**

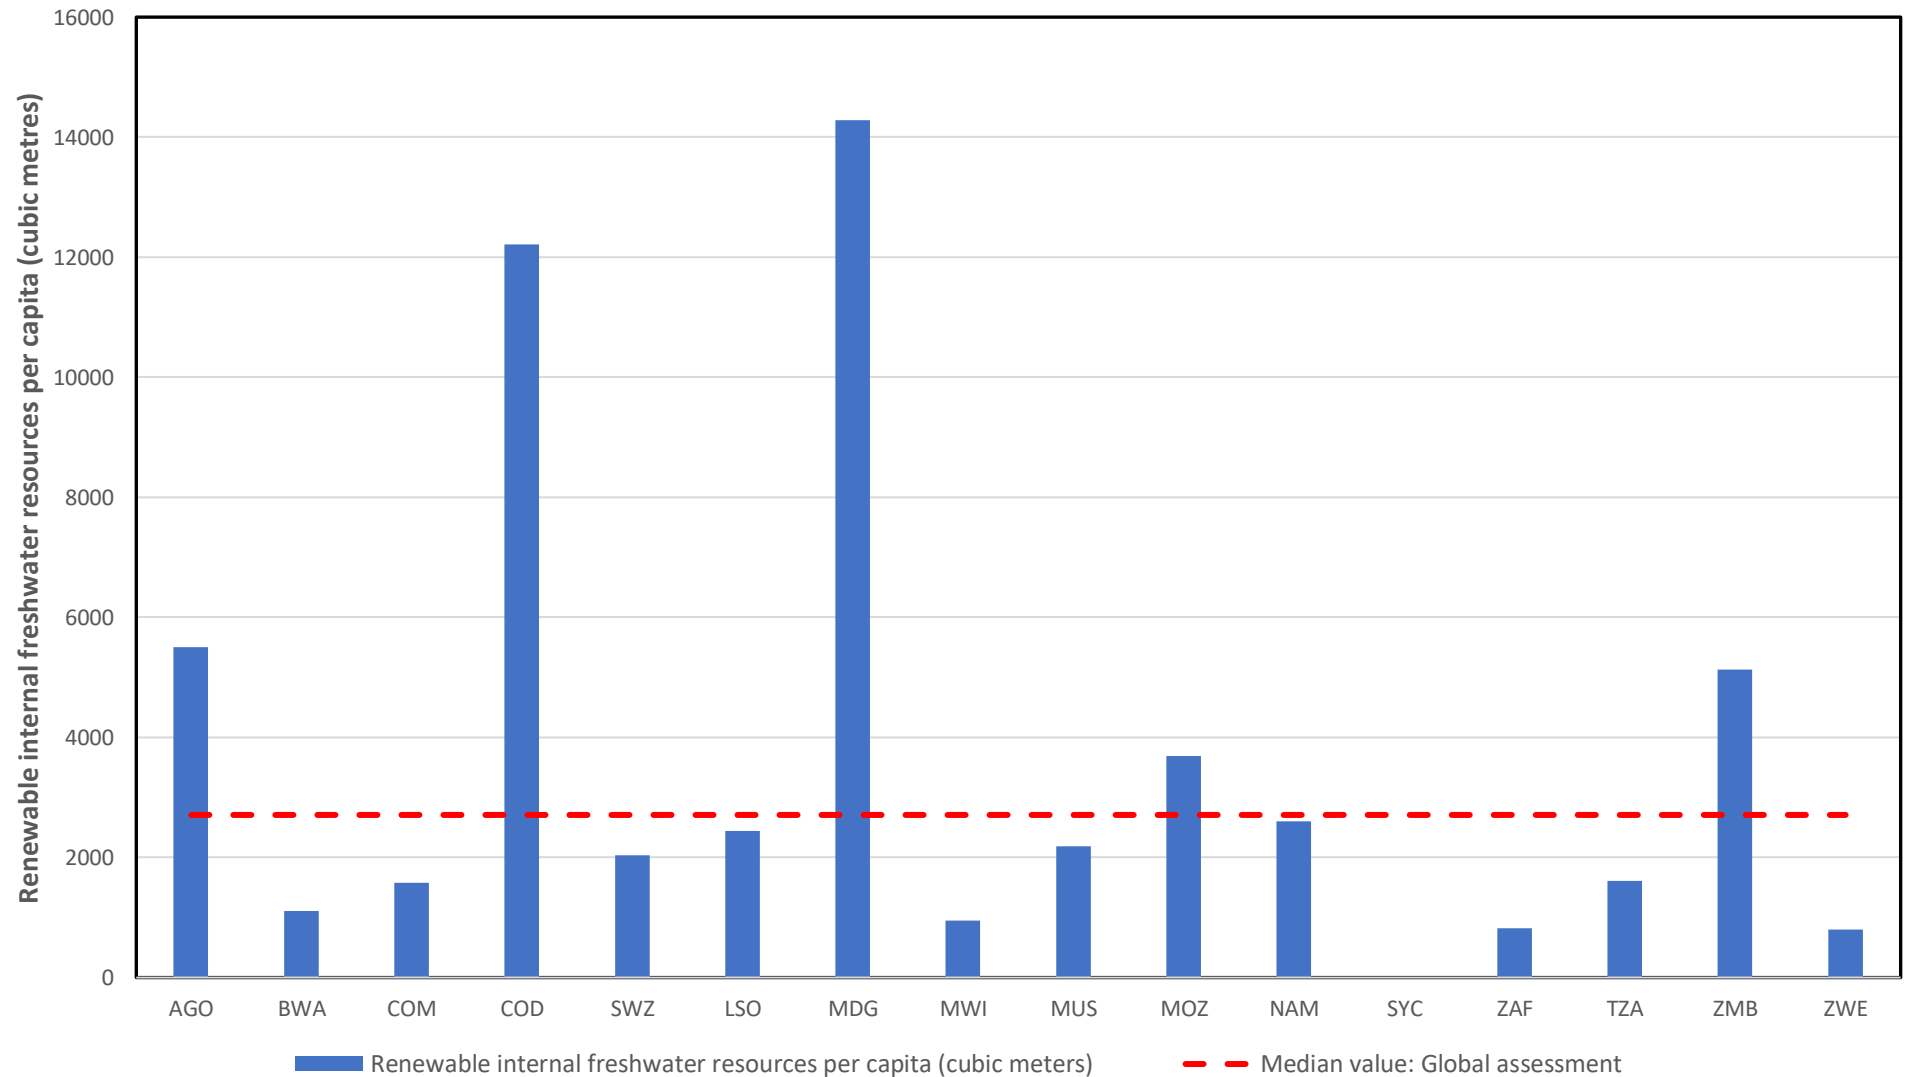

**Figure S.6: Graph of the Environmental Flow Requirements, with median value for global assessment for sixteen SADC countries (World Bank: Food and Agriculture Organization, AQUASTAT data – 2017 data)**

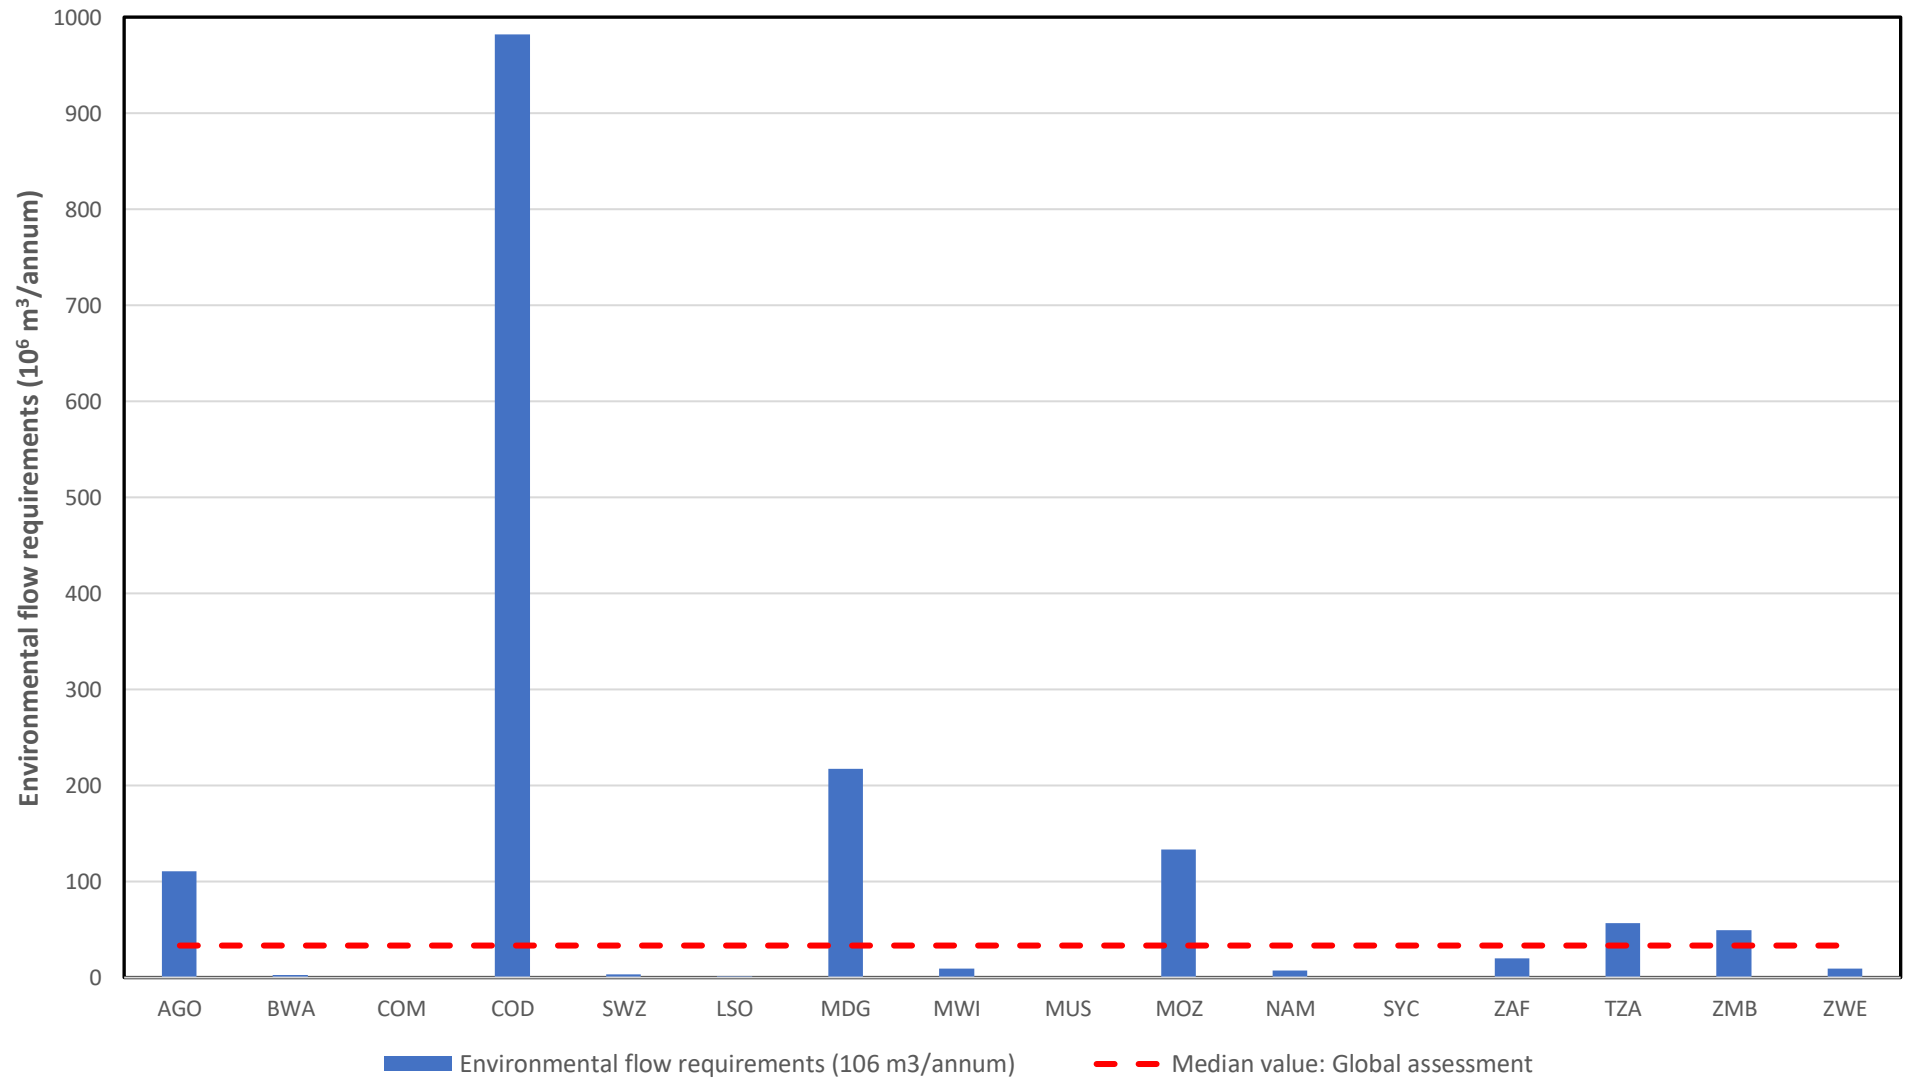

Figure S.7: Graph of the Average Precipitation Depth, with median value for global assessment for sixteen SADC countries (World Bank: Food and Agriculture Organization – 2014 data)

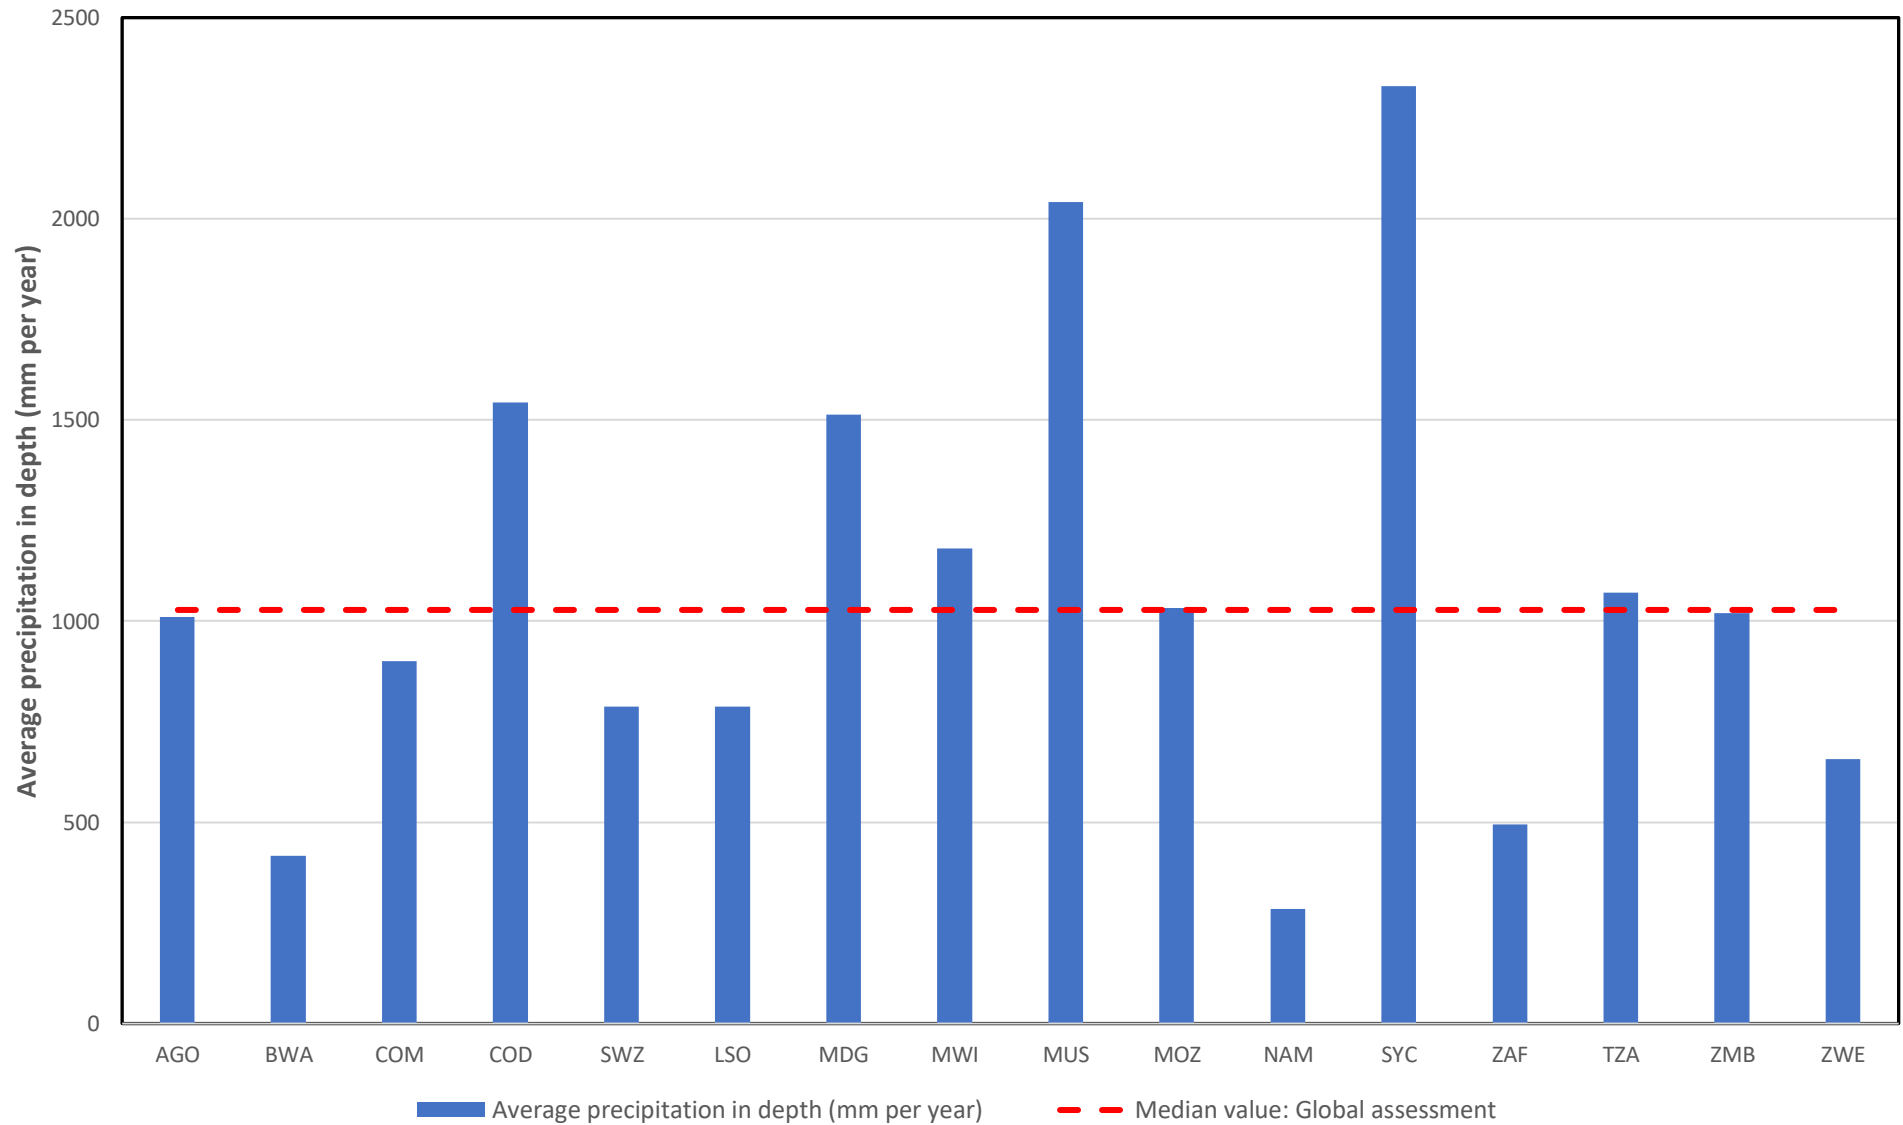

Figure S.8: Graph of the Access to Electricity, with median value for global assessment for sixteen SADC countries (World Bank: Sustainable Energy for All (SE4ALL) database – 2016 data)

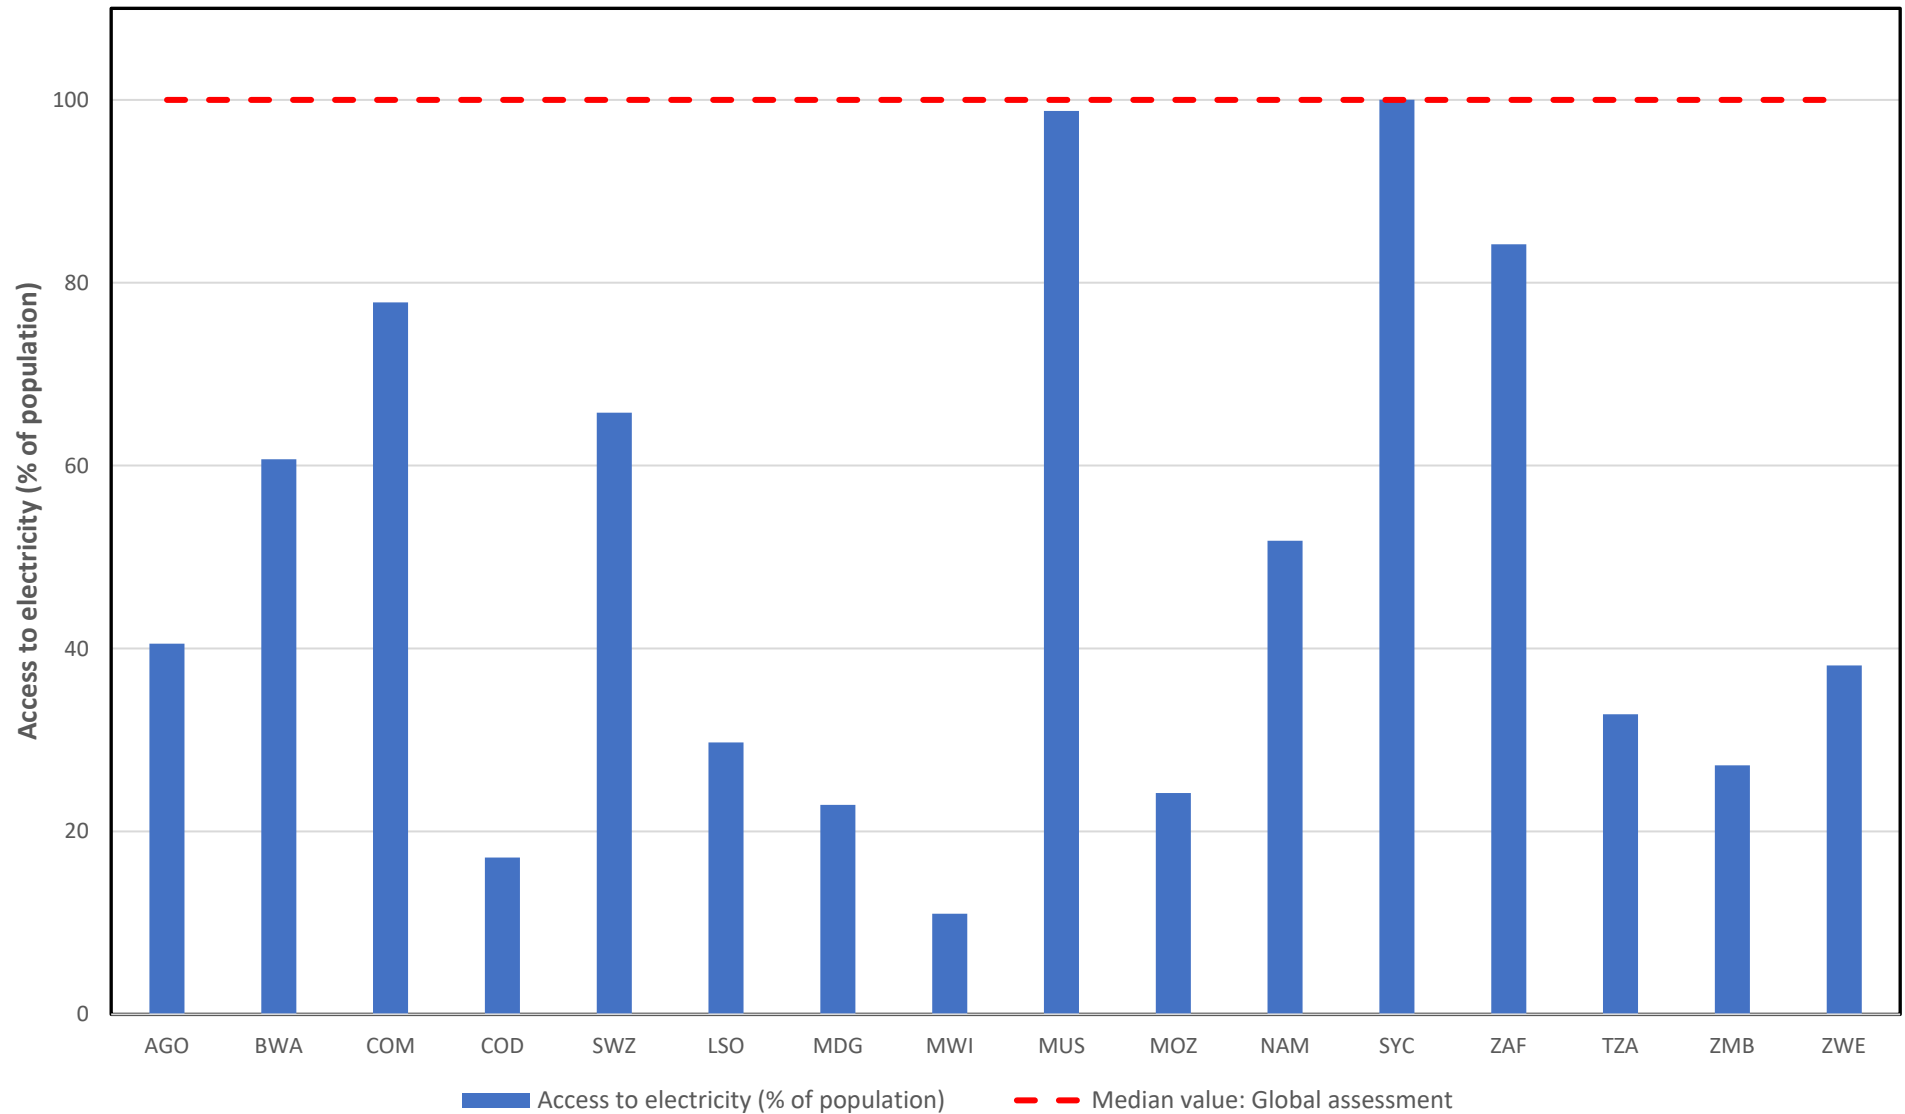

Figure S.9: Graph of Renewable Energy Consumption, with median value for global assessment for sixteen SADC countries (World Bank: Sustainable Energy for All (SE4ALL) database – 2015 data)

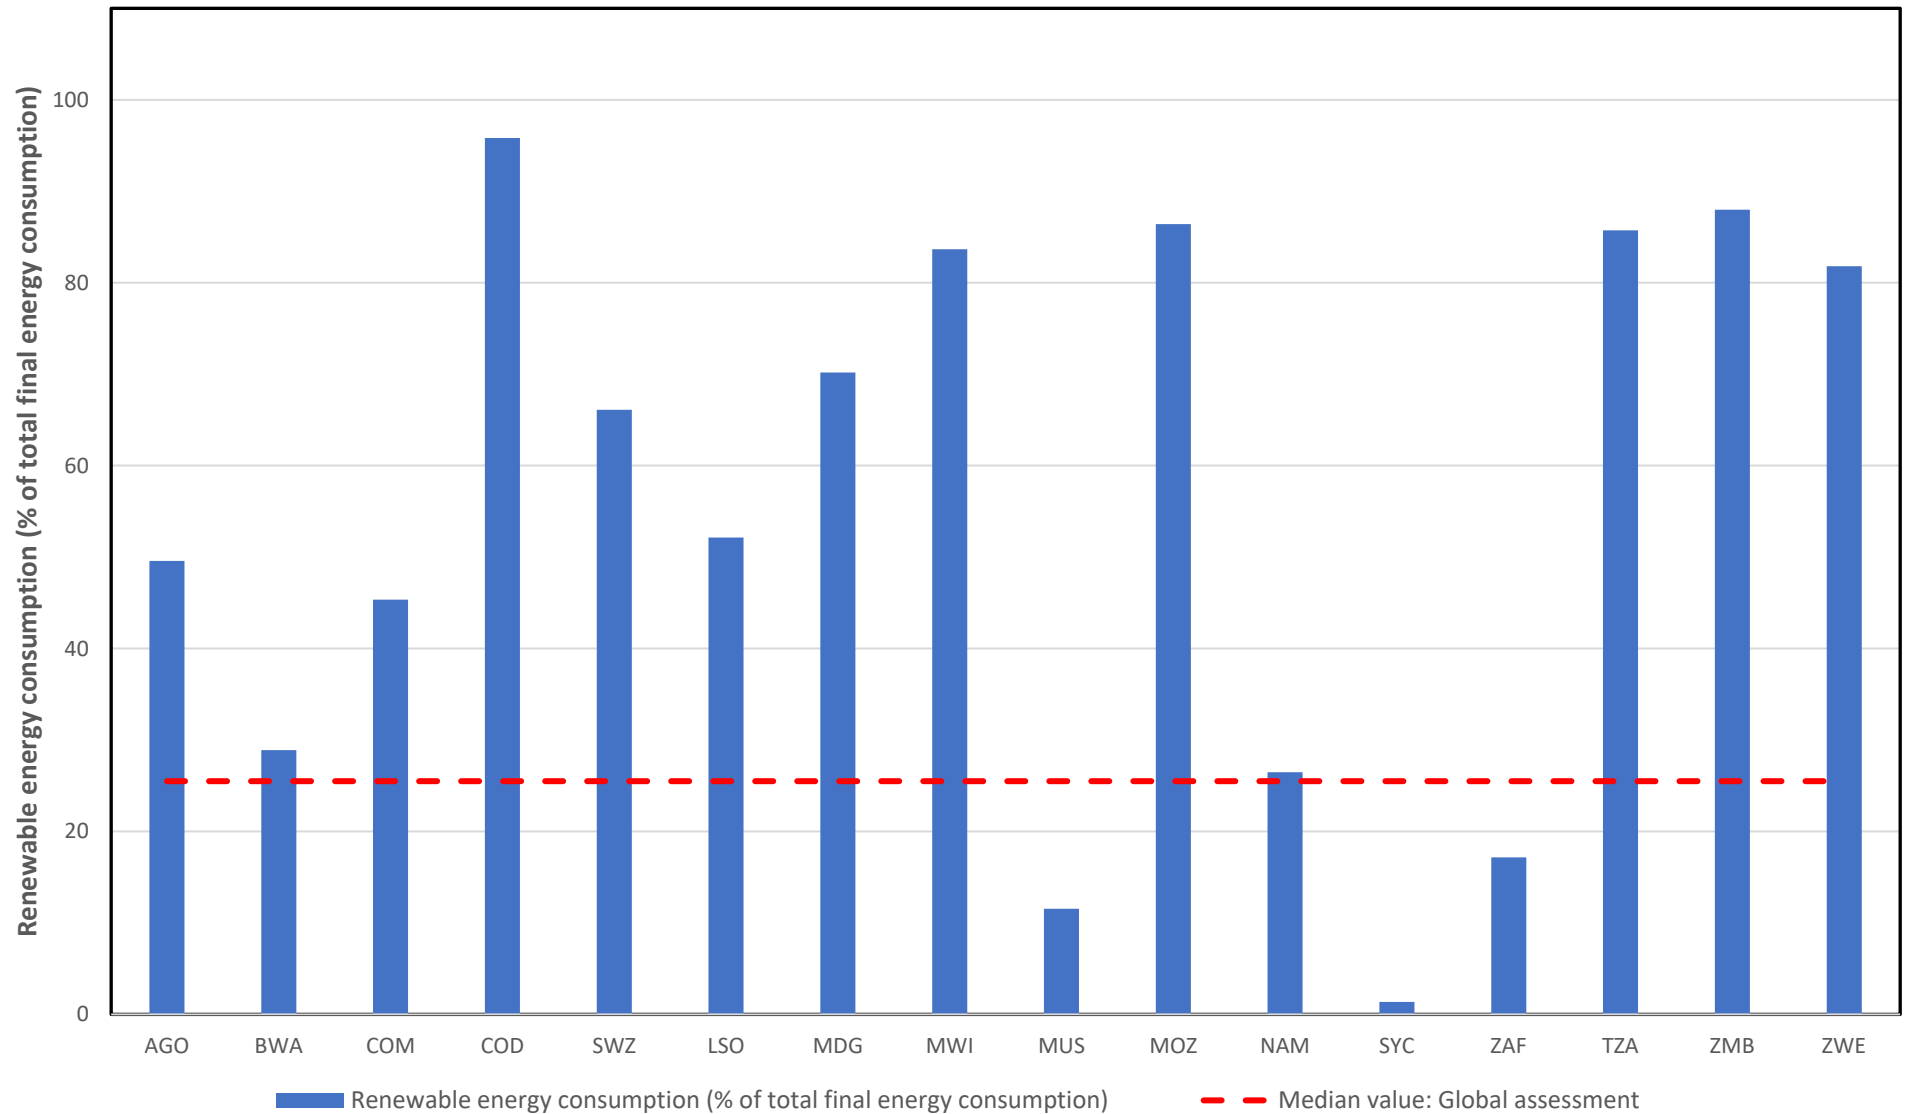

Figure S.10: Graph of Renewable Electricity Output, with median value for global assessment for sixteen SADC countries (World Bank: IEA Statistics – 2015 data)

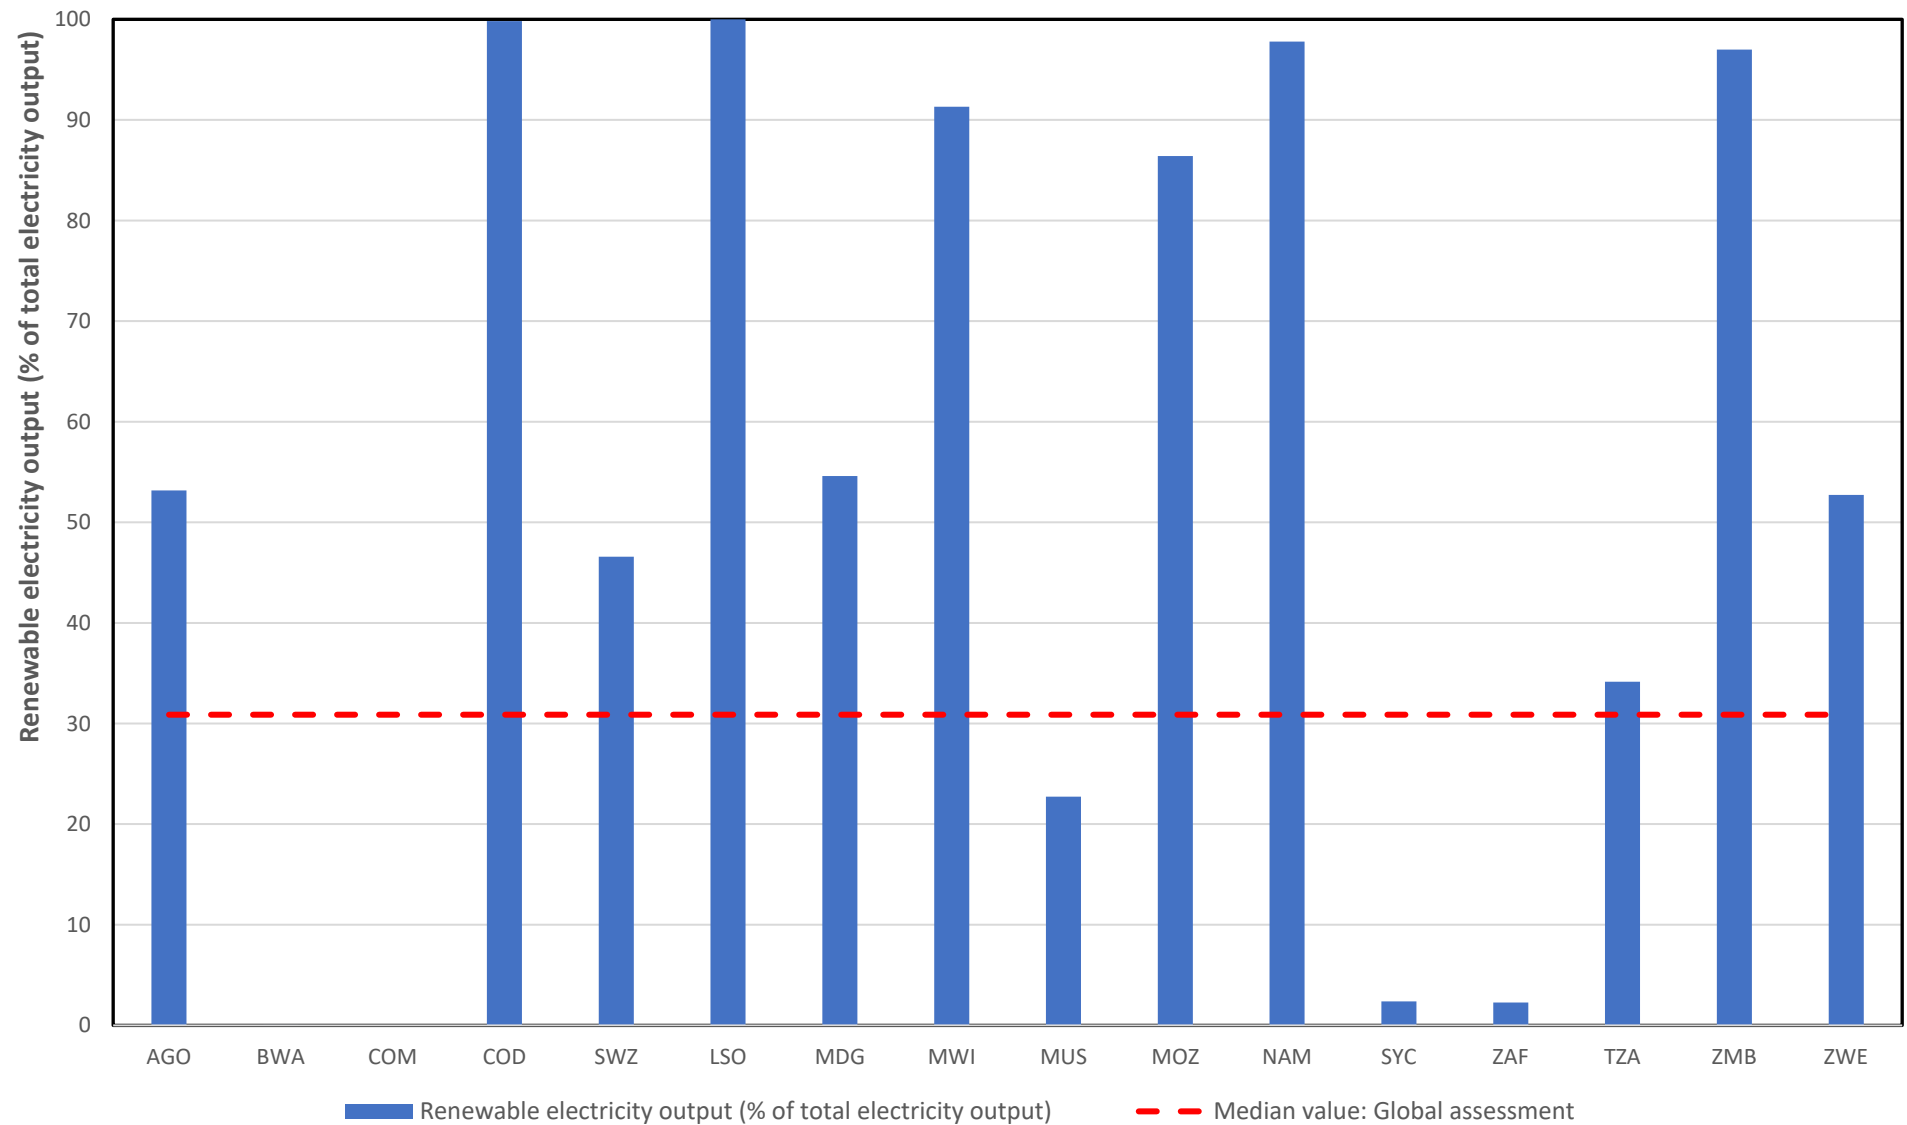

Figure S.11: Graph of CO<sub>2</sub> Emissions, with median value for global assessment for sixteen SADC countries (World Bank: Carbon Dioxide Information Analysis Centre, Environmental Sciences Division – 2014 data)

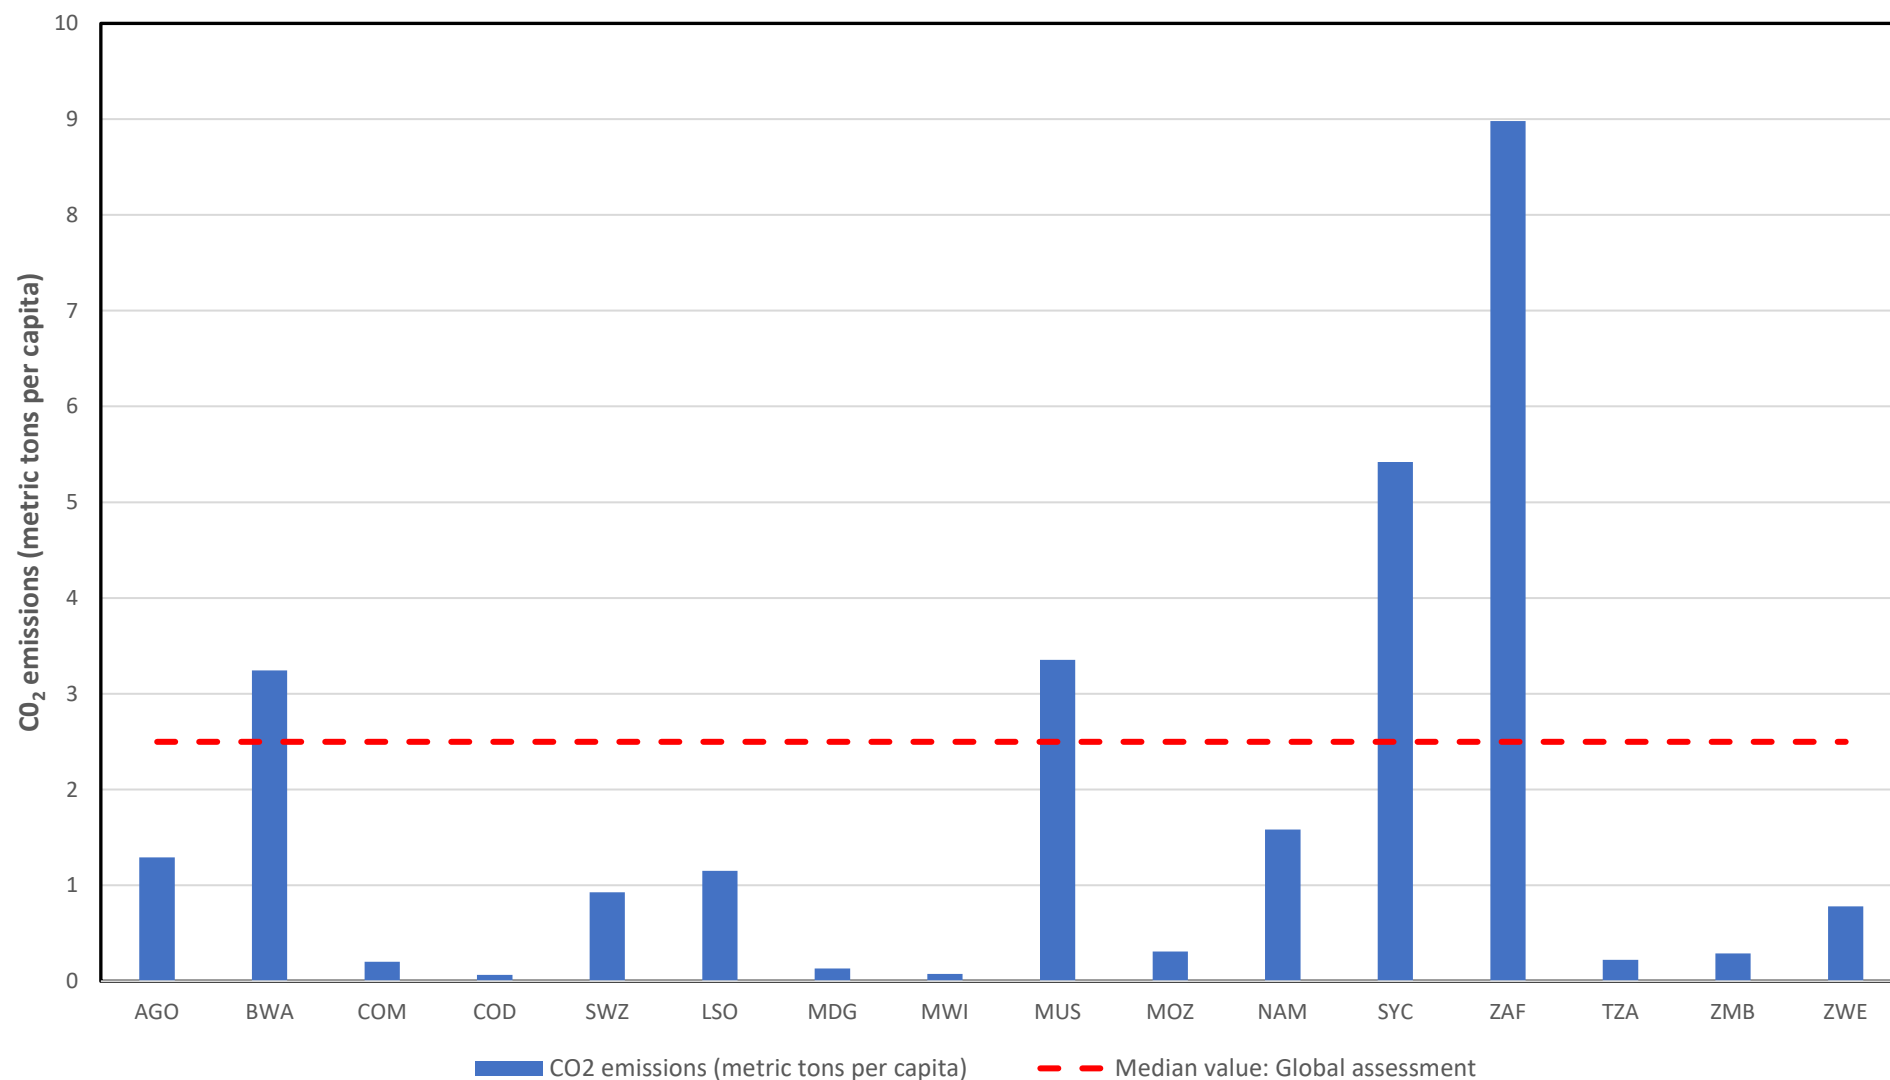

**Figure S.12: Graph of Electric Power Consumption, with median value for global assessment for sixteen SADC countries (World Bank: IEA Statistics– 2014 data)**

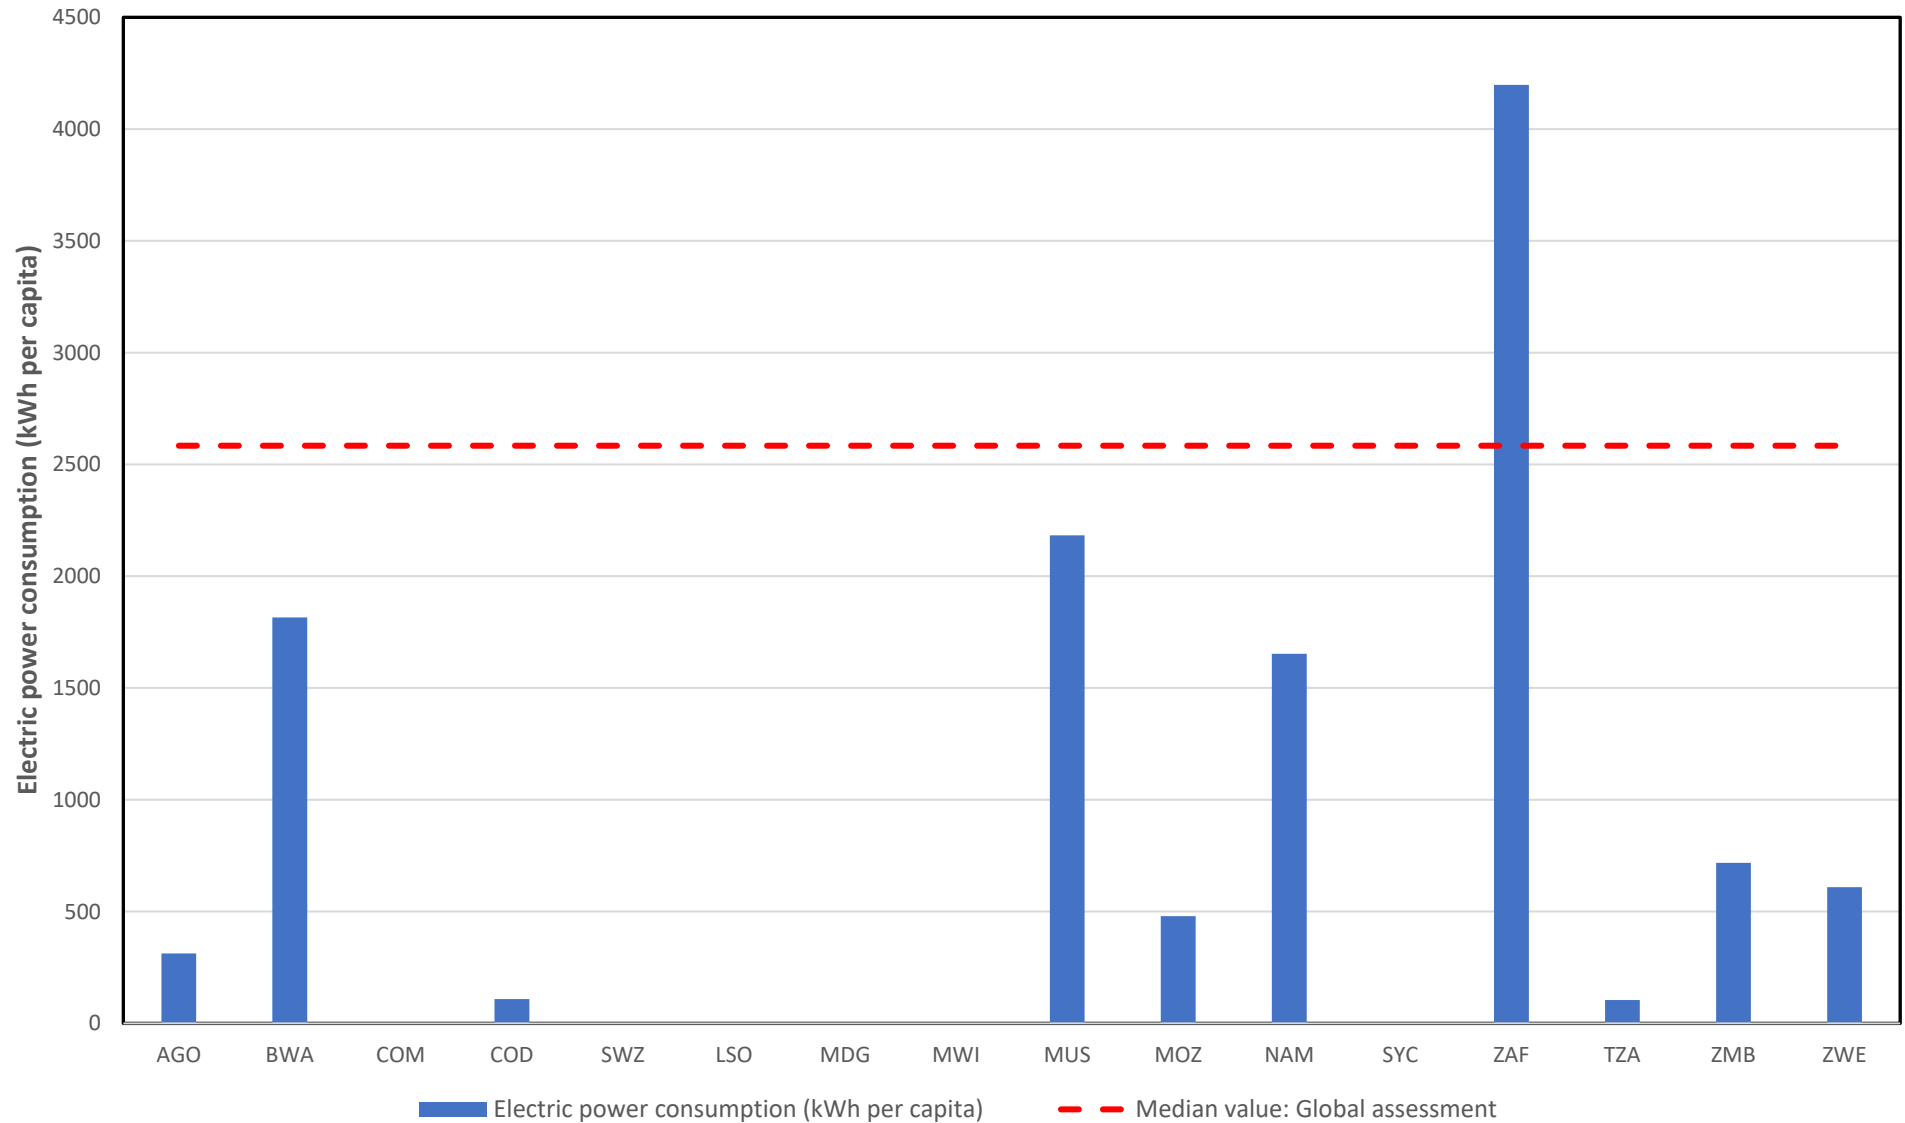

**Figure S.13: Graph of Energy Imports, with median value for global assessment for sixteen SADC countries (World Bank: IEA Statistics – 2015, 2014, 2013 data) - A negative value indicates that the country is a net exporter.**

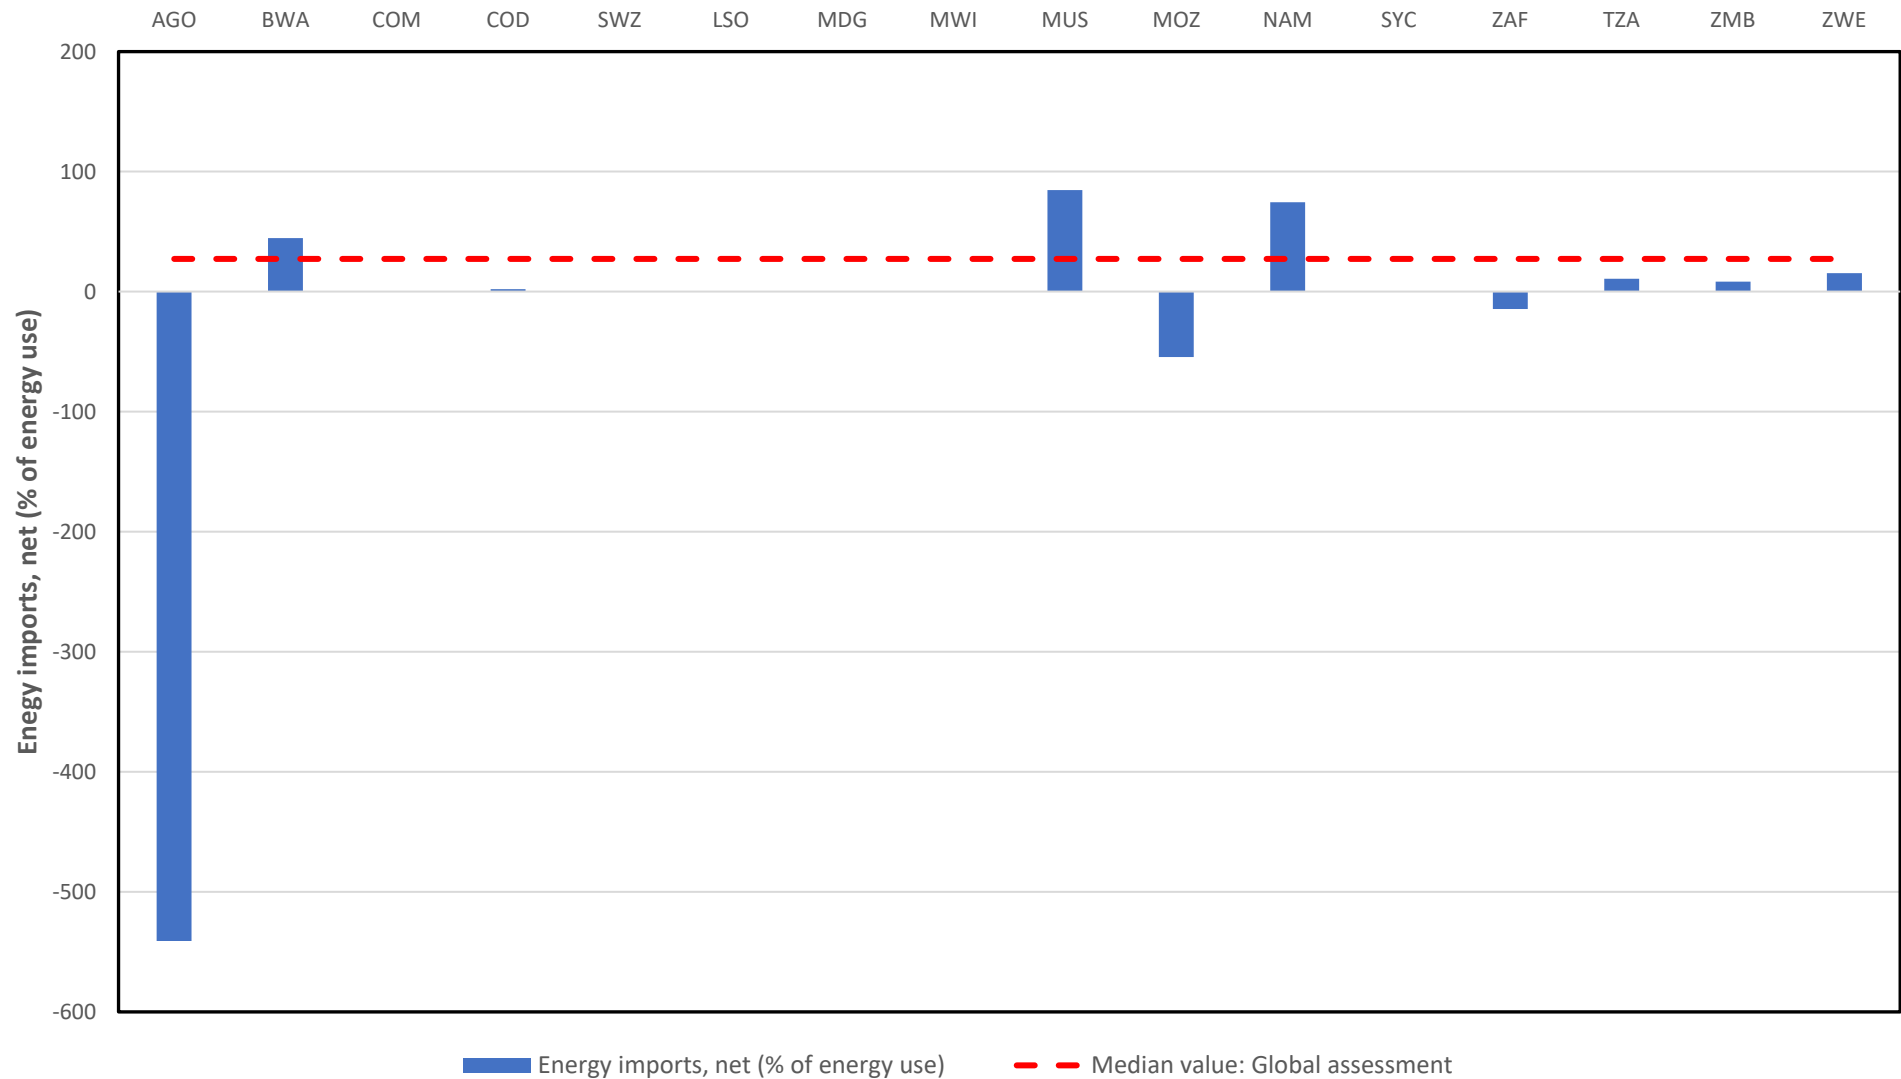

Figure S.14: Graph of the Prevalence of Undernourishment, with median value for global assessment for sixteen SADC countries (FAOSTAT and ESS calculations 2015 - 2017 data)

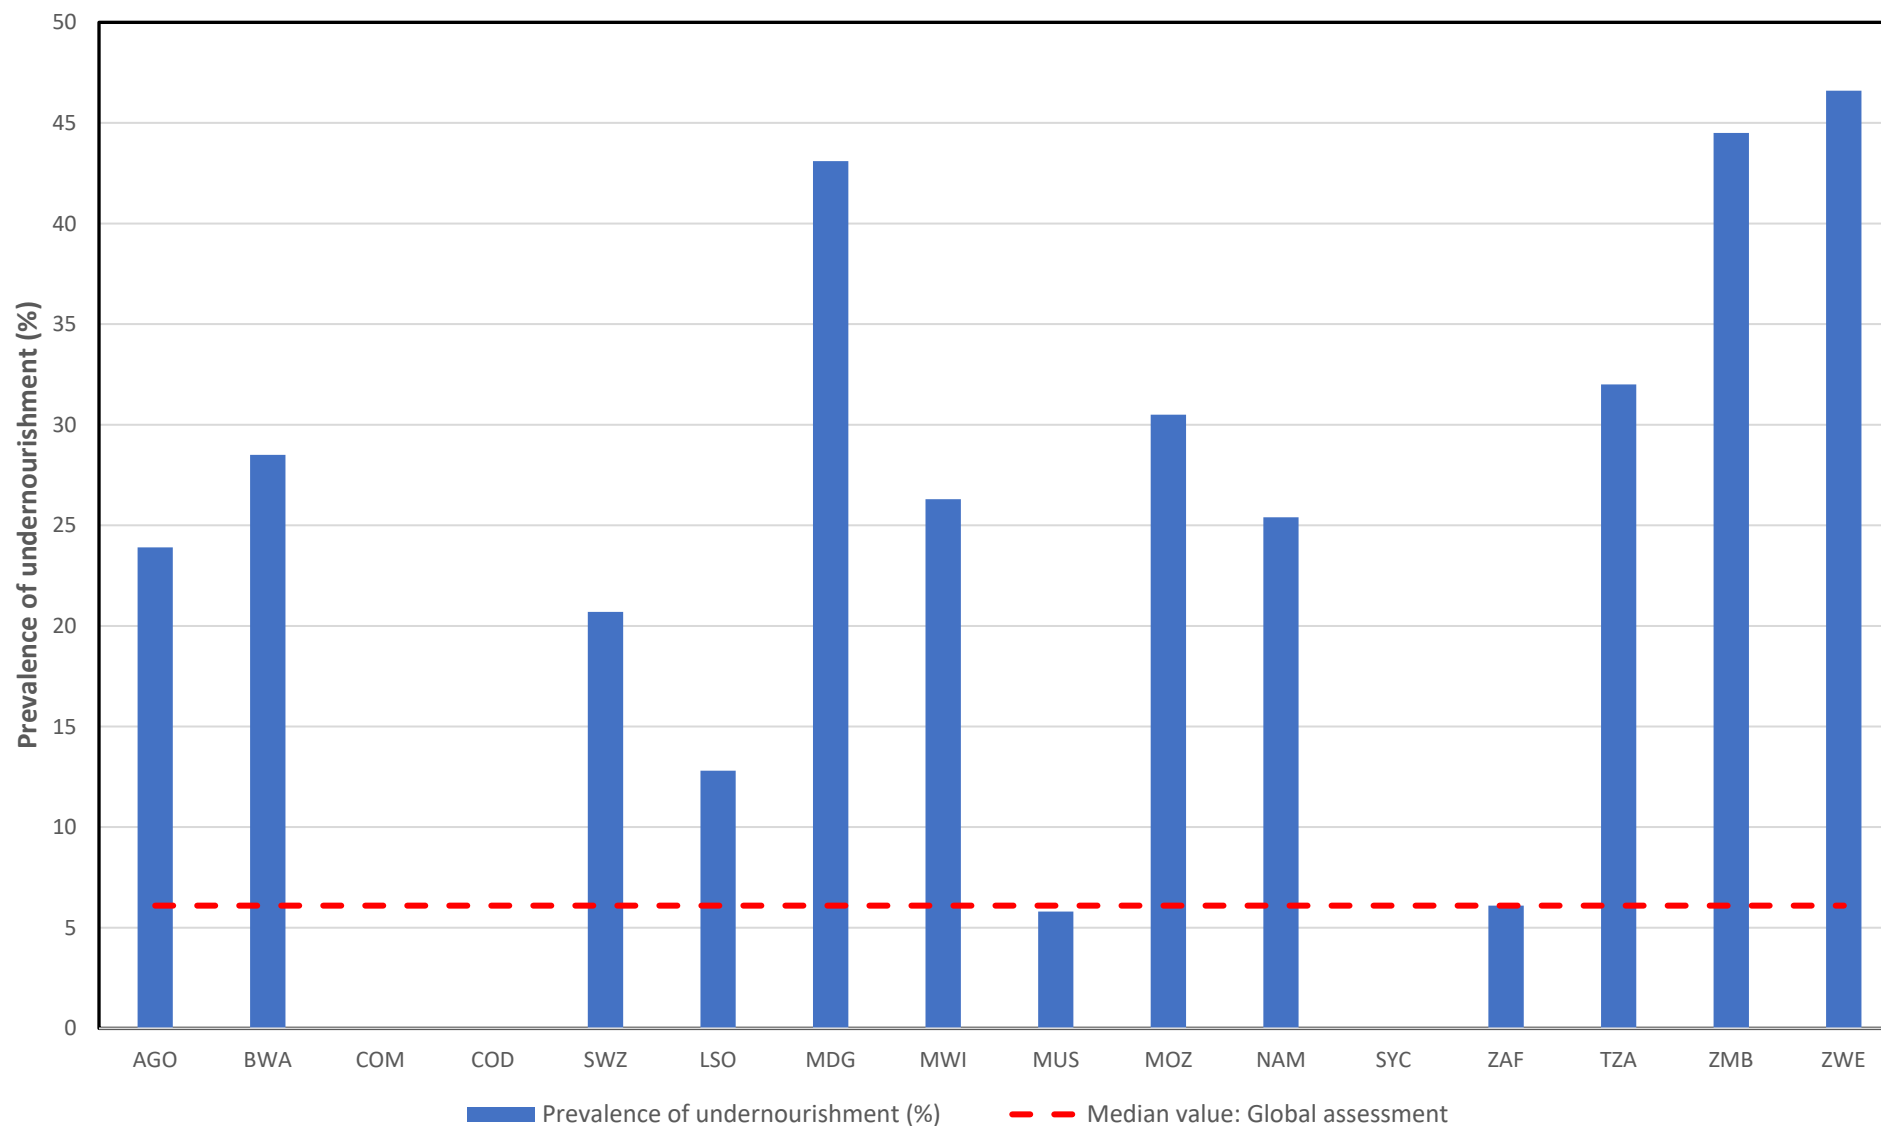

**Figure S.15: Graph of the Prevalence of Children under five years of age affected by wasting, with median value for global assessment for sixteen SADC countries (FAO: Food Security Indicators - 2016 data)**

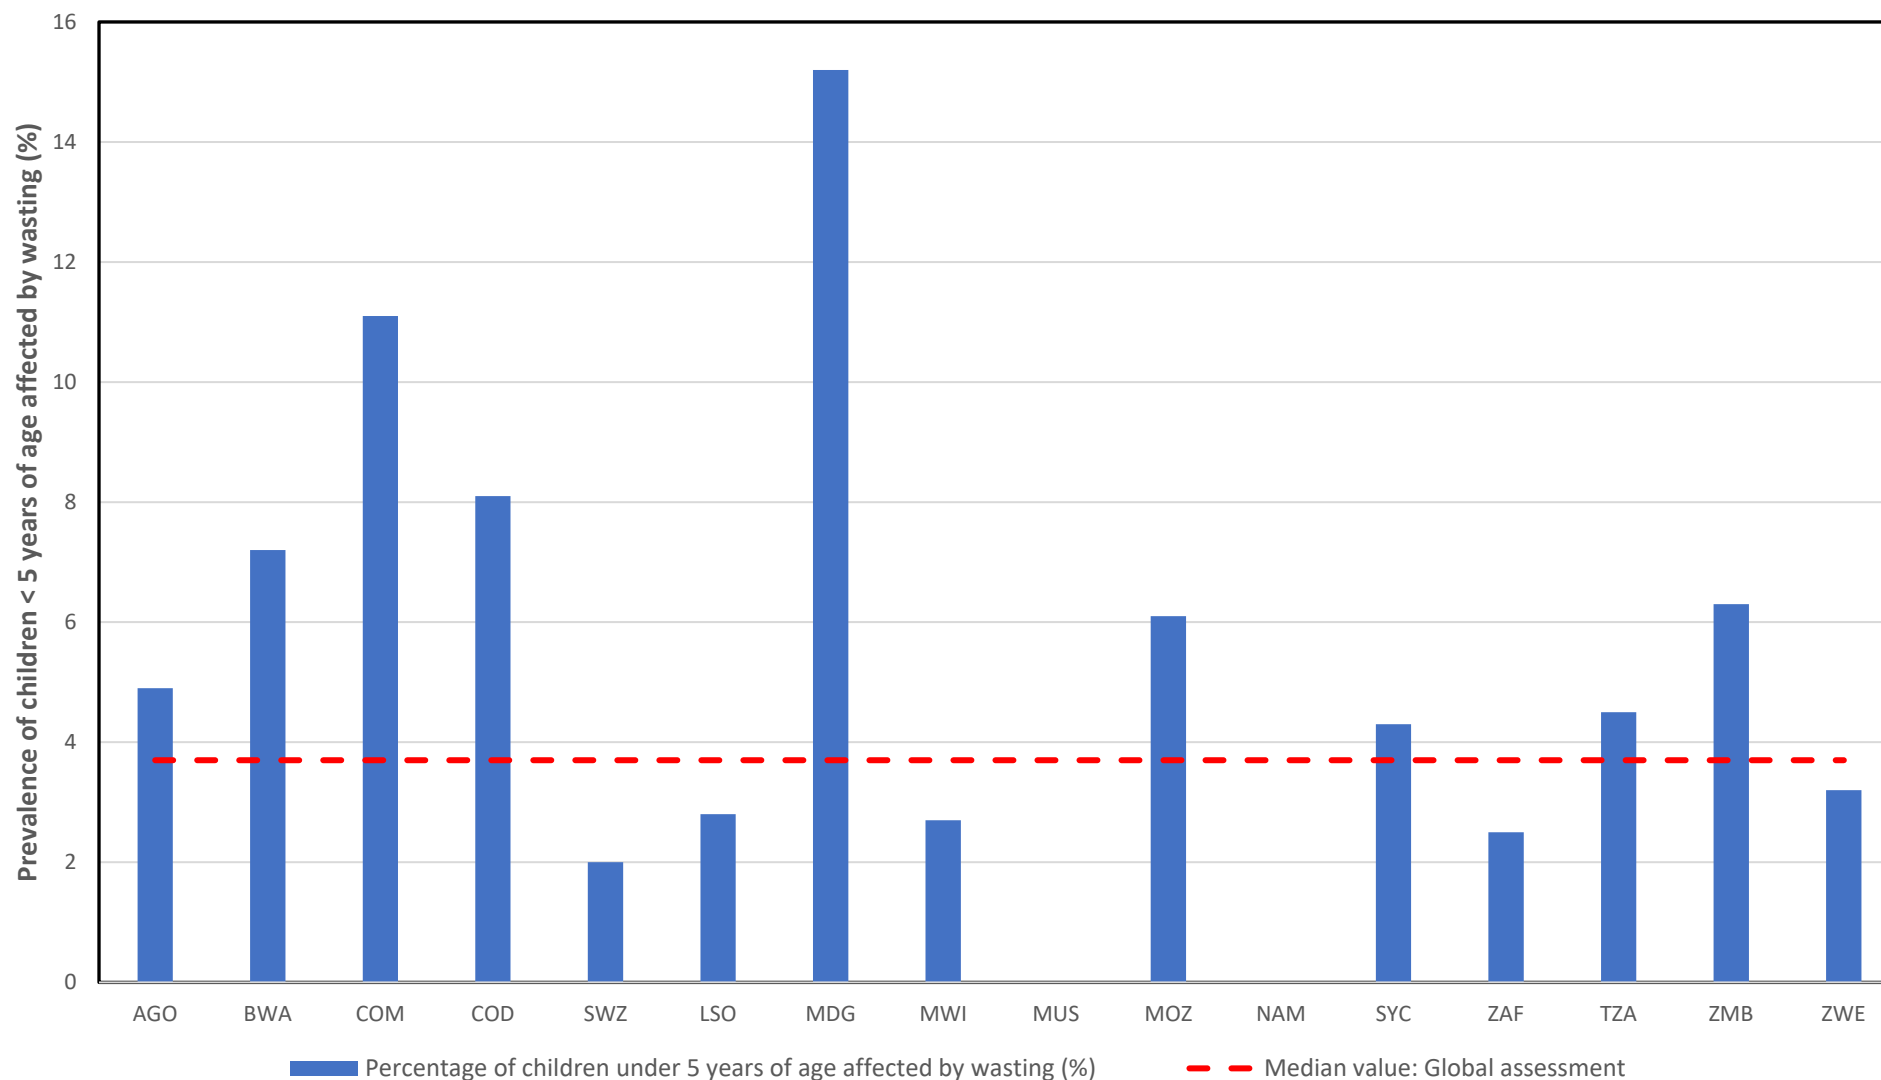

Figure S.16: Graph of the Prevalence of Children under five years of age who are stunted, with median value for global assessment for sixteen SADC countries (FAO: Food Security Indicators - 2016 data)

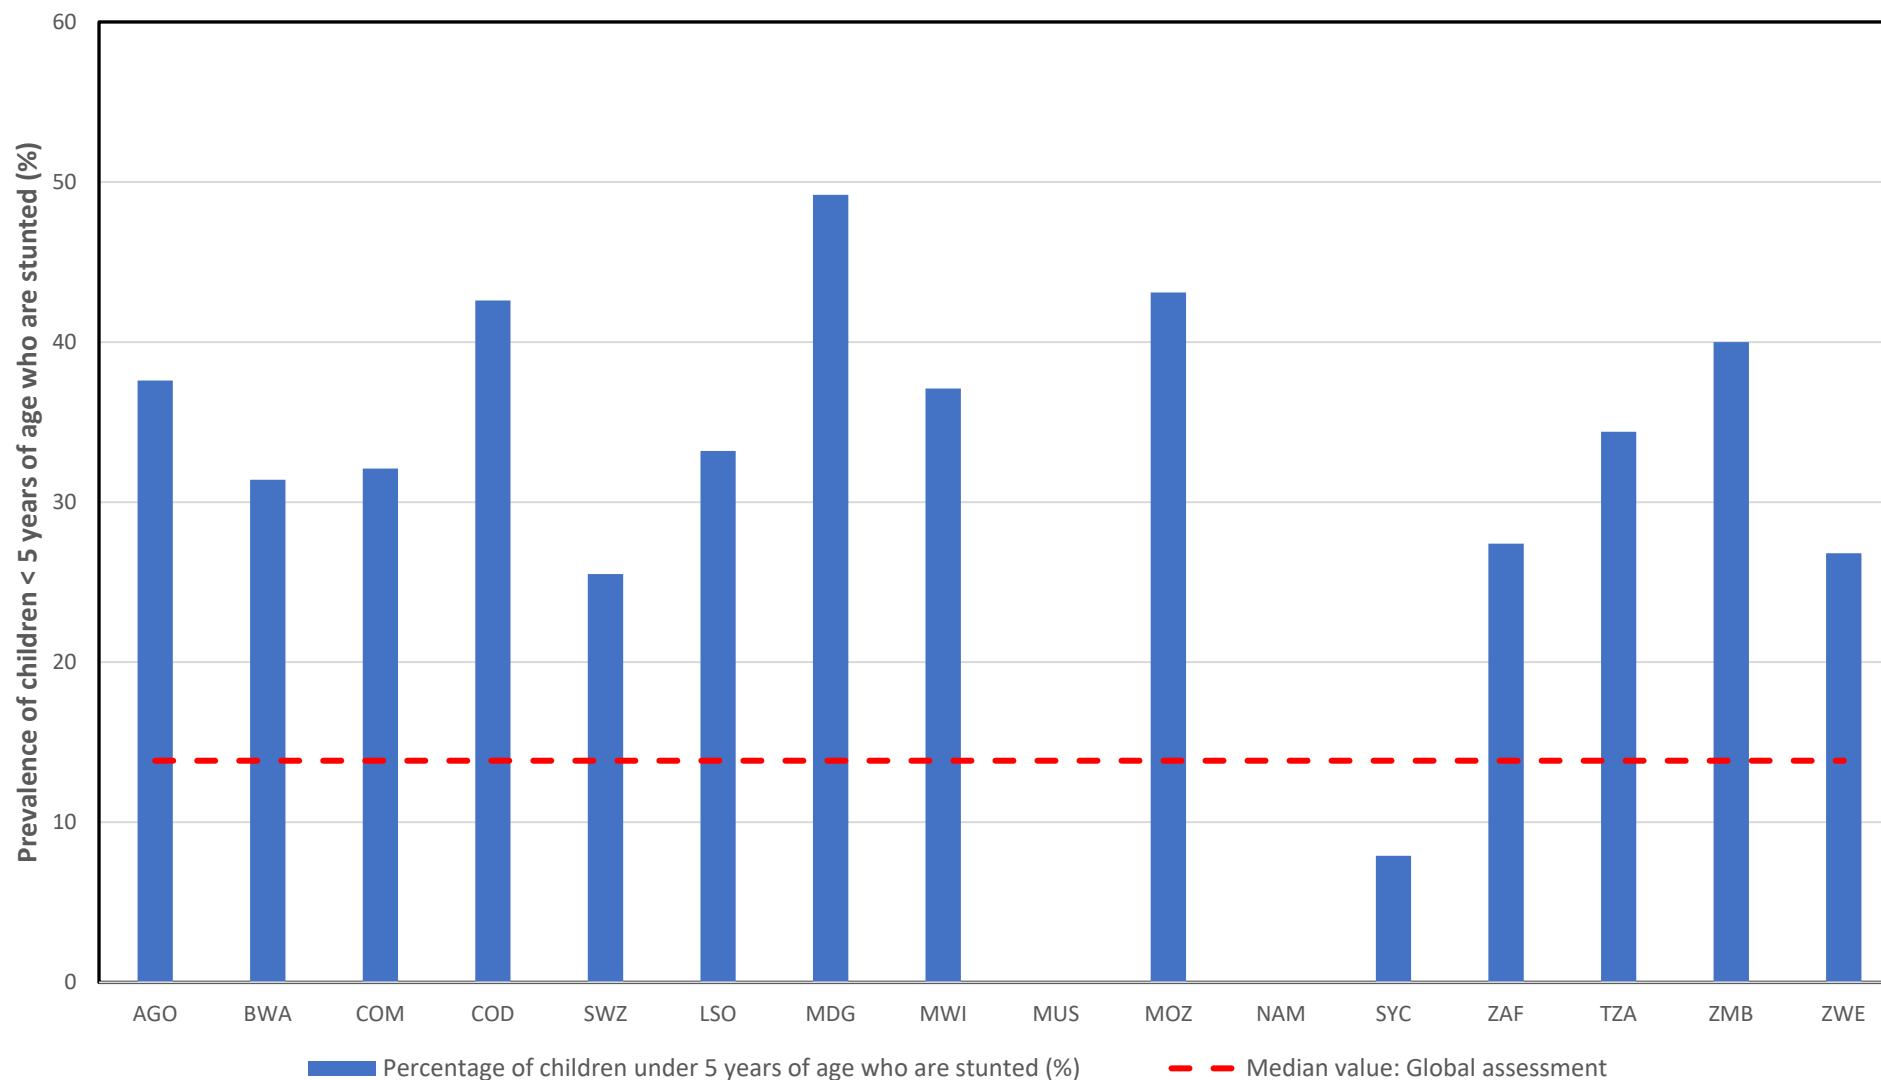

**Figure S.17: Graph of the Prevalence of Obesity in the adult population (18 years and older), with median value for global assessment for sixteen SADC countries (FAO: Food Security Indicators - 2016 data)**

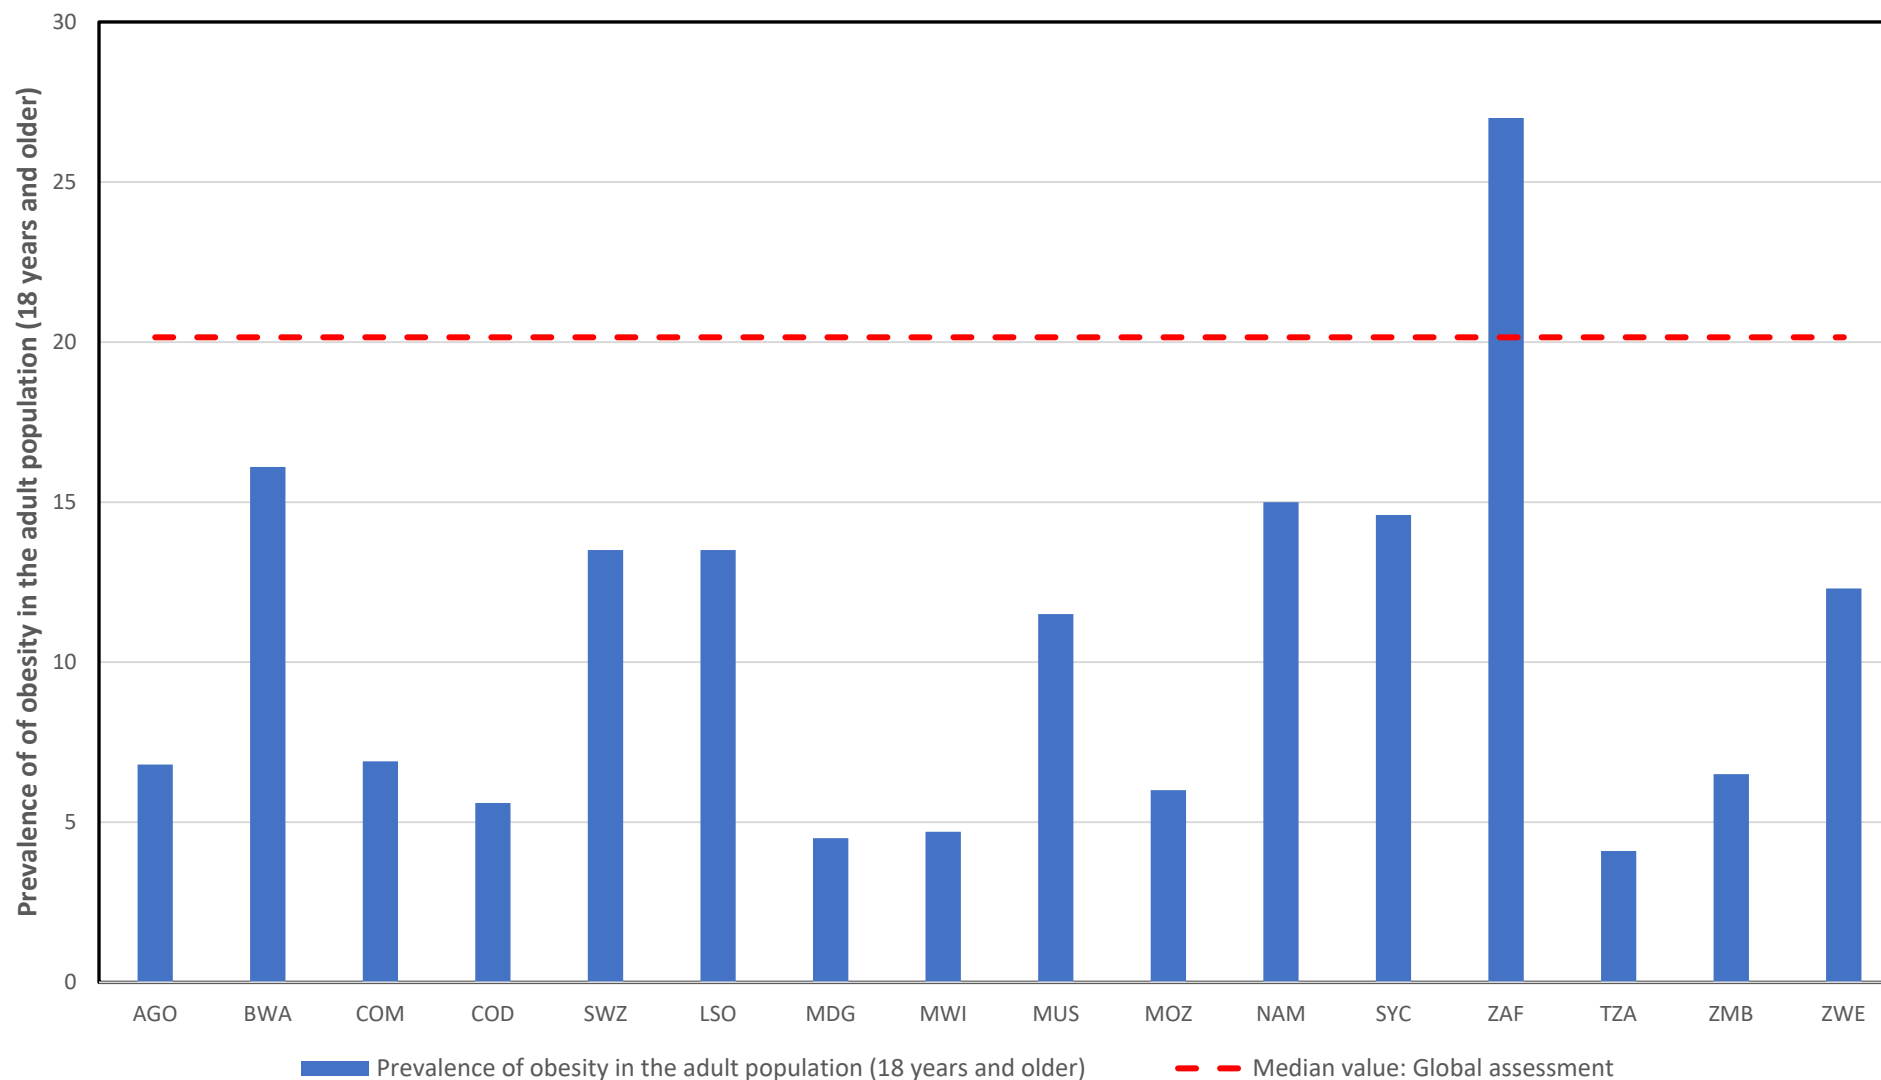

**Figure S.18: Graph of the Average Protein Supply, with median value for global assessment for sixteen SADC countries (FAO: Food Security Indicators: 2011 to 2013 data)**

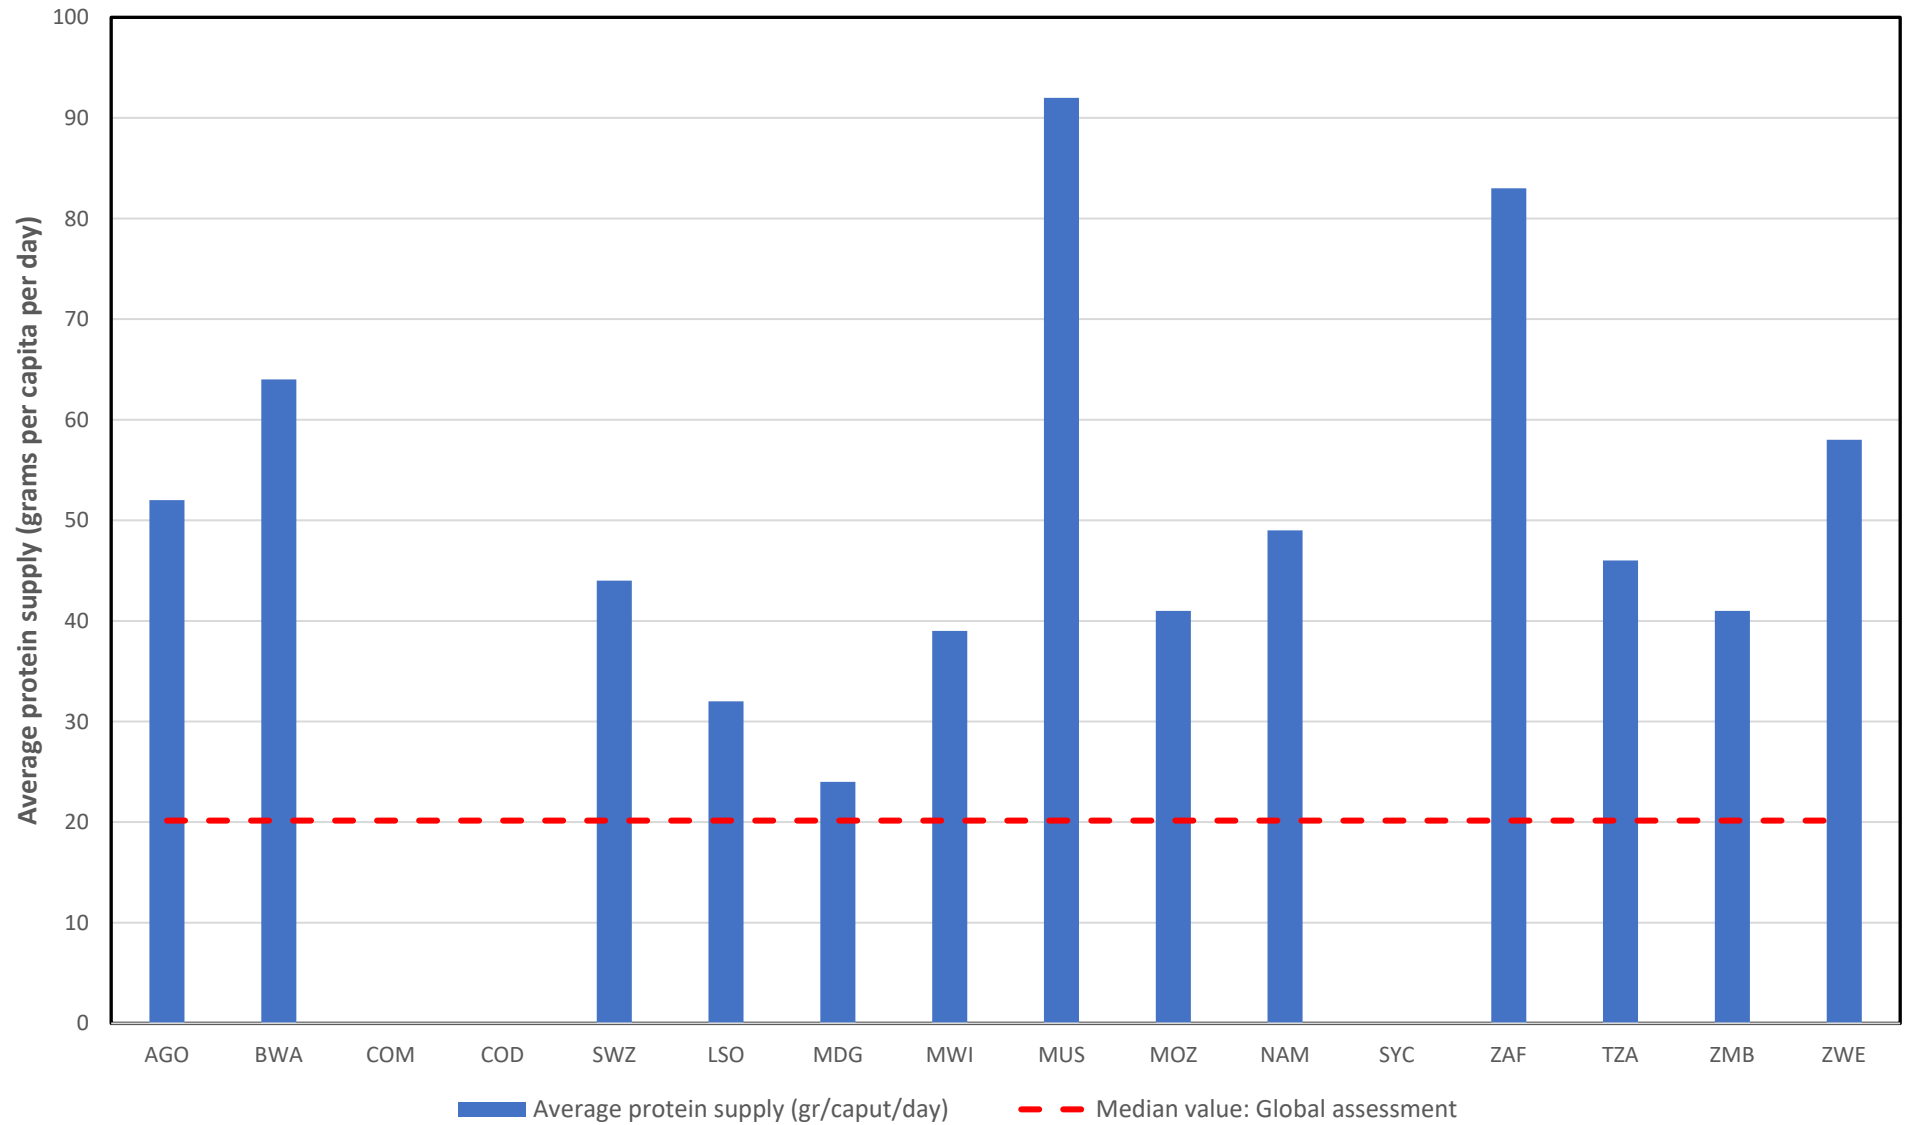

**Figure S.19: Graph of the Cereal Yield (annual), with median value for global assessment for sixteen SADC countries (World Bank: 2016 data)**

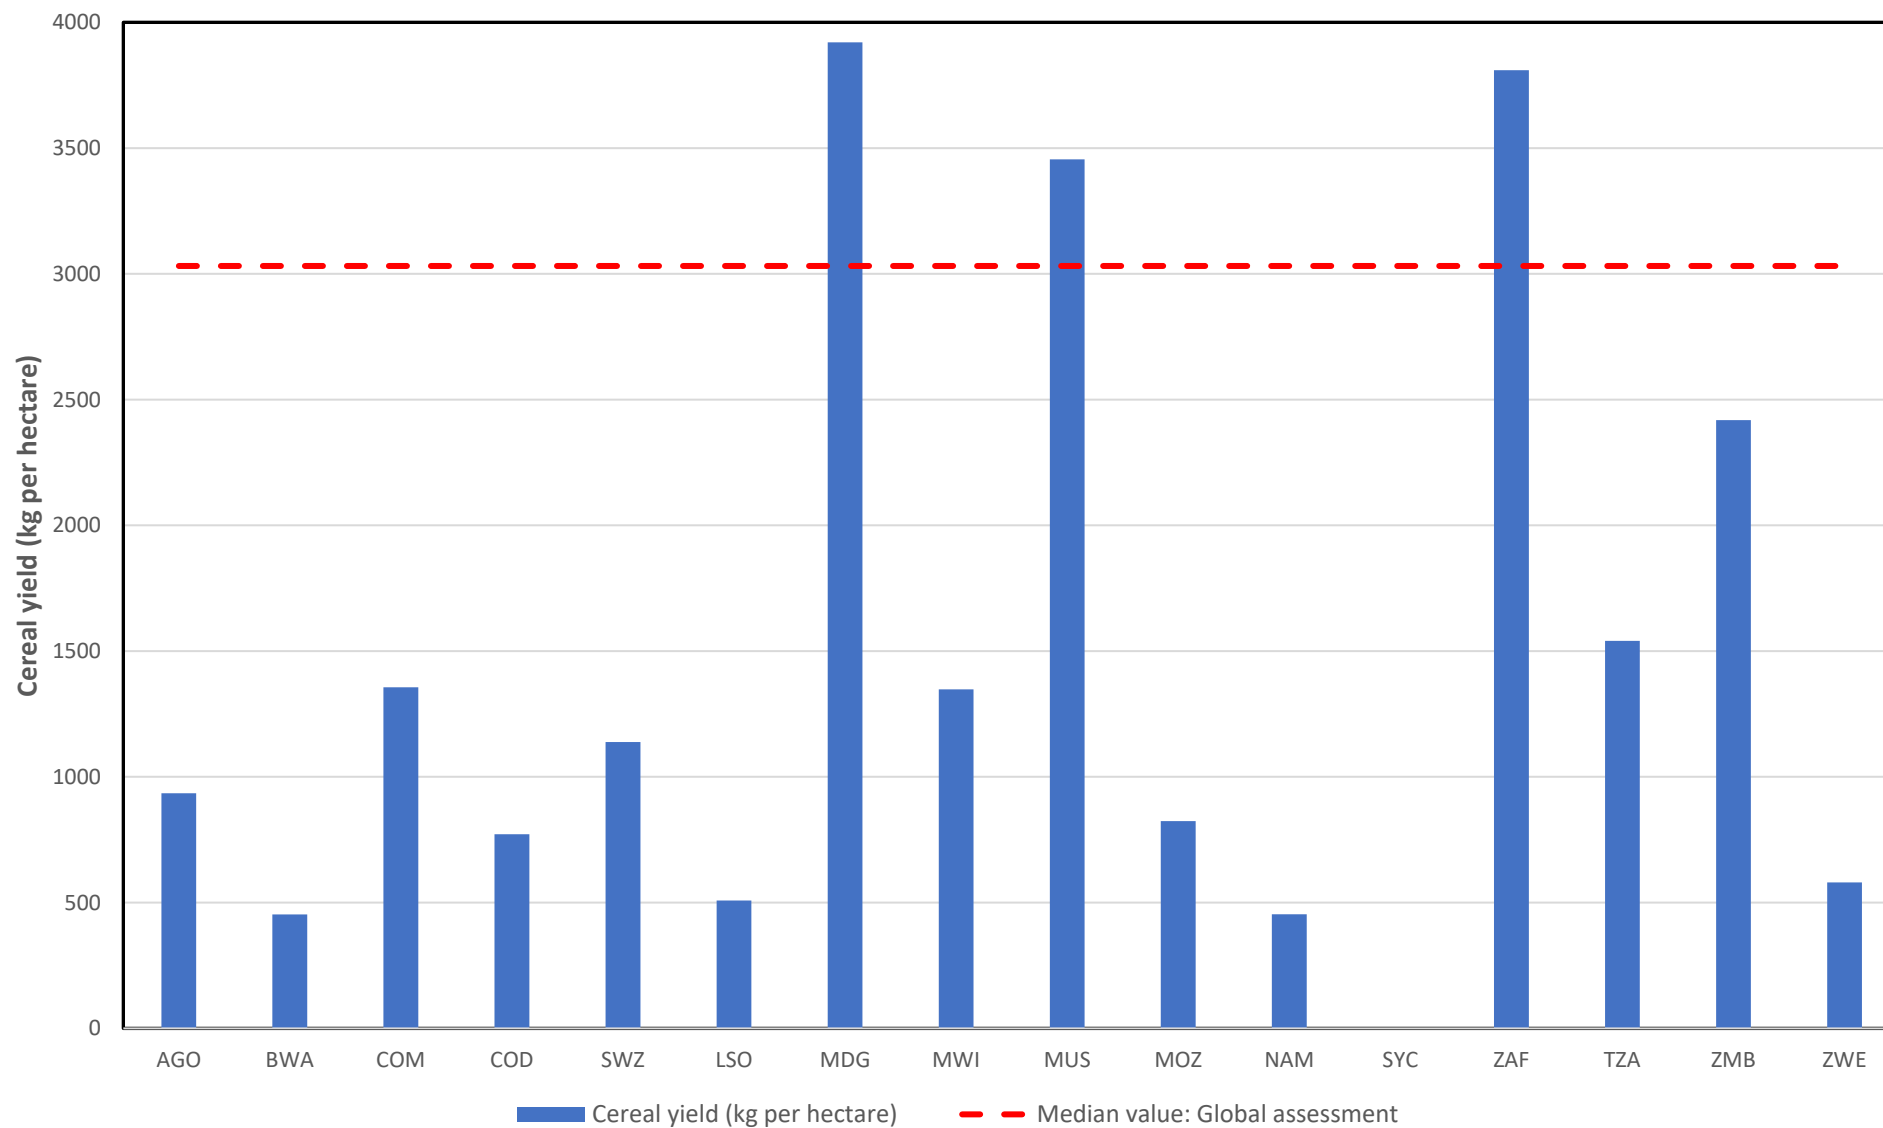

Figure S.20: Graph of the Average Dietary Energy Supply Adequacy, with median value for global assessment for sixteen SADC countries (FAO: Food Security Indicators - 2016 data)

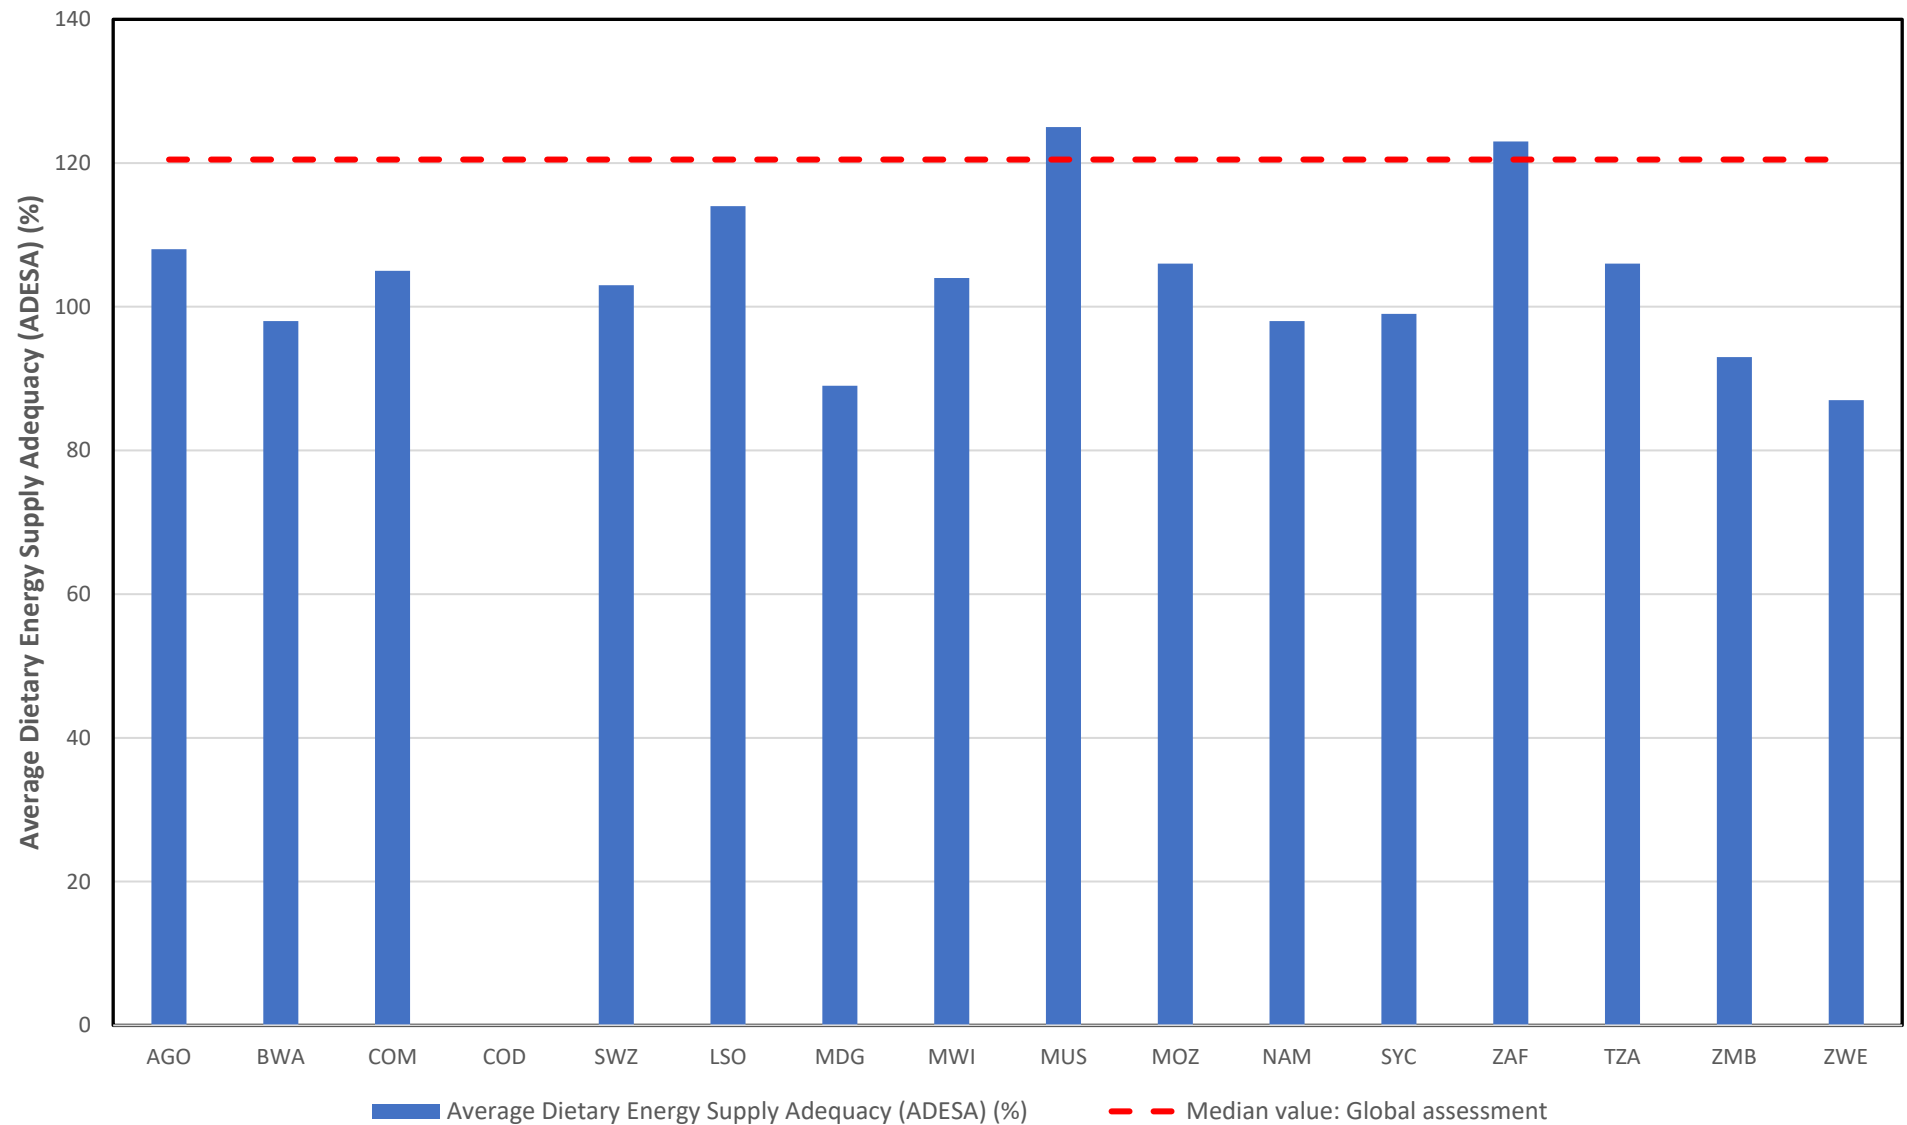

Figure S.21: Graph of the Average Value of Food Production, with median value for global assessment for sixteen SADC countries (FAO: Food Security Indicators: 1999 - 2014 data)

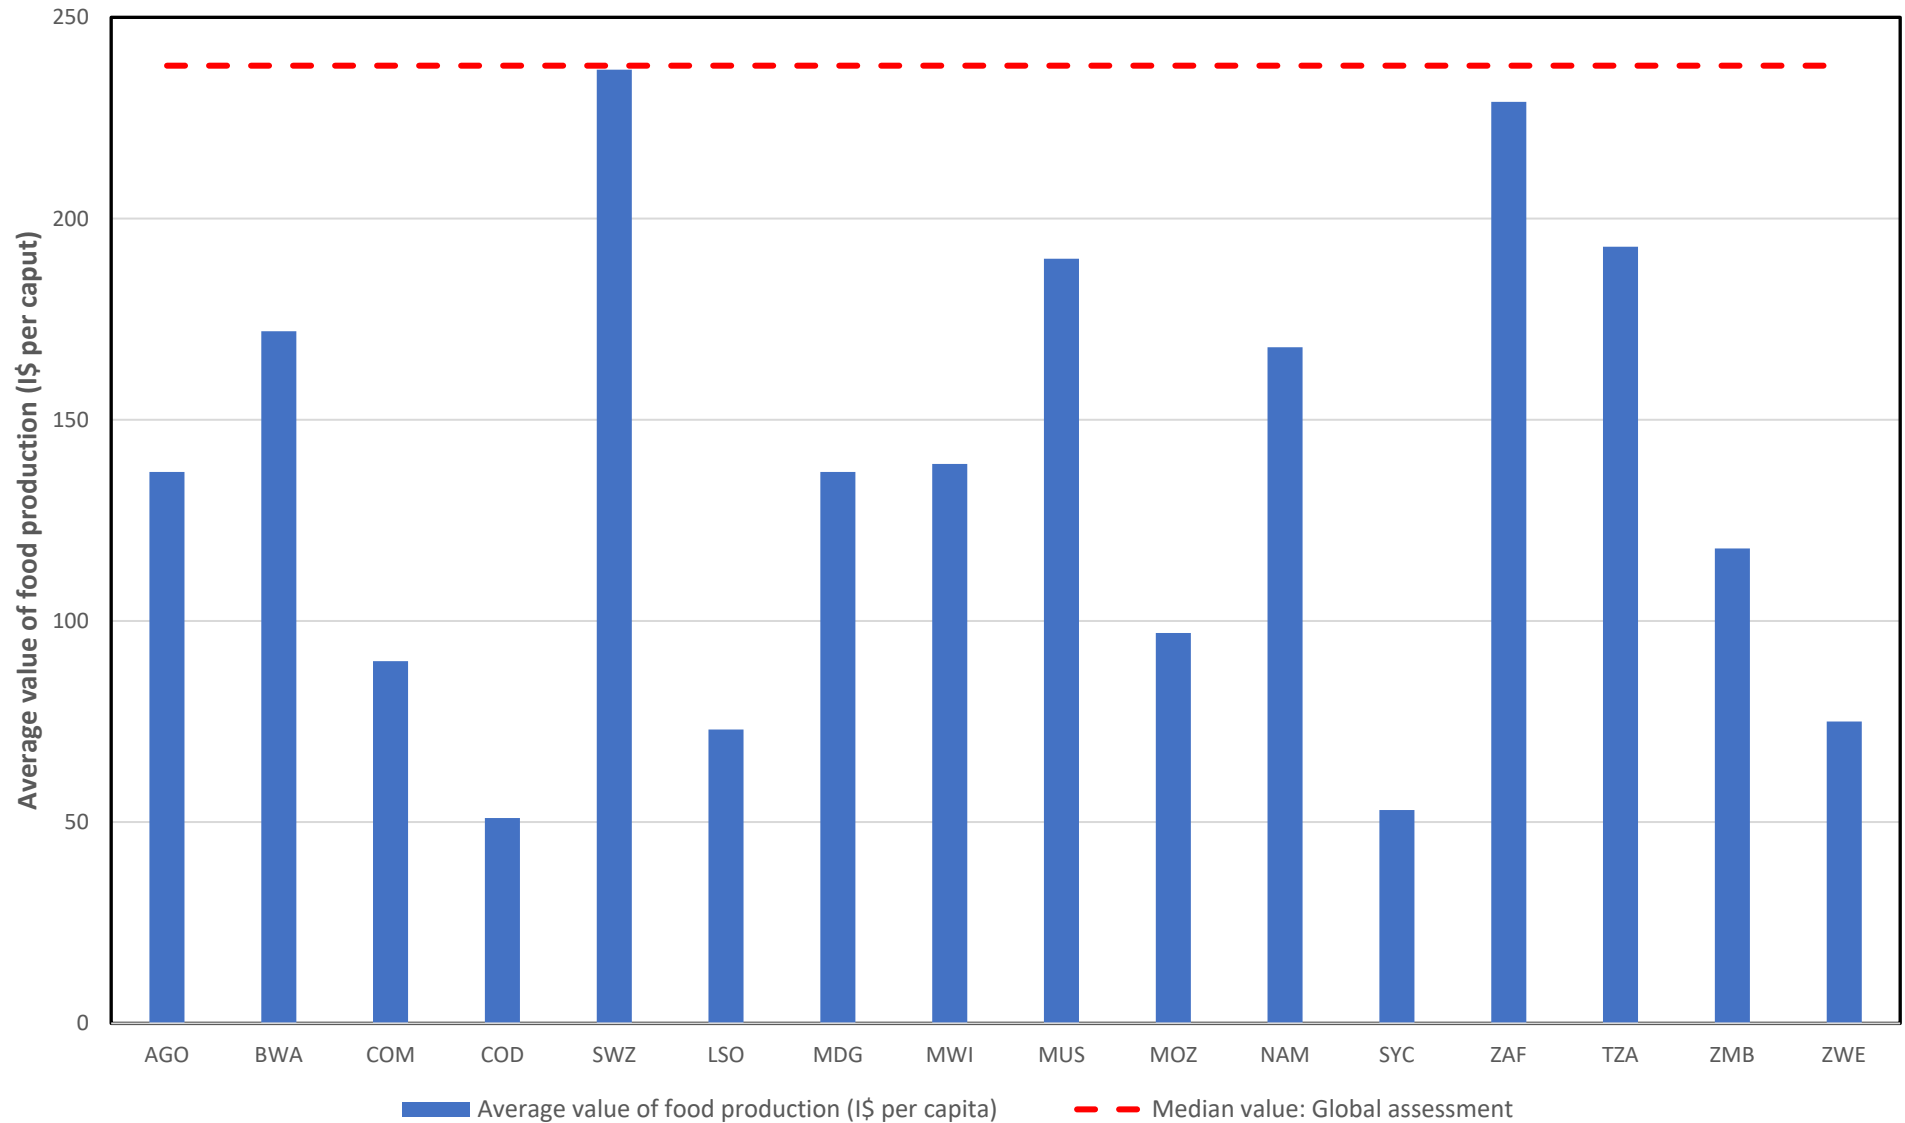

Figure S22: Human Development Index versus the WEF Nexus Index for 181 countries

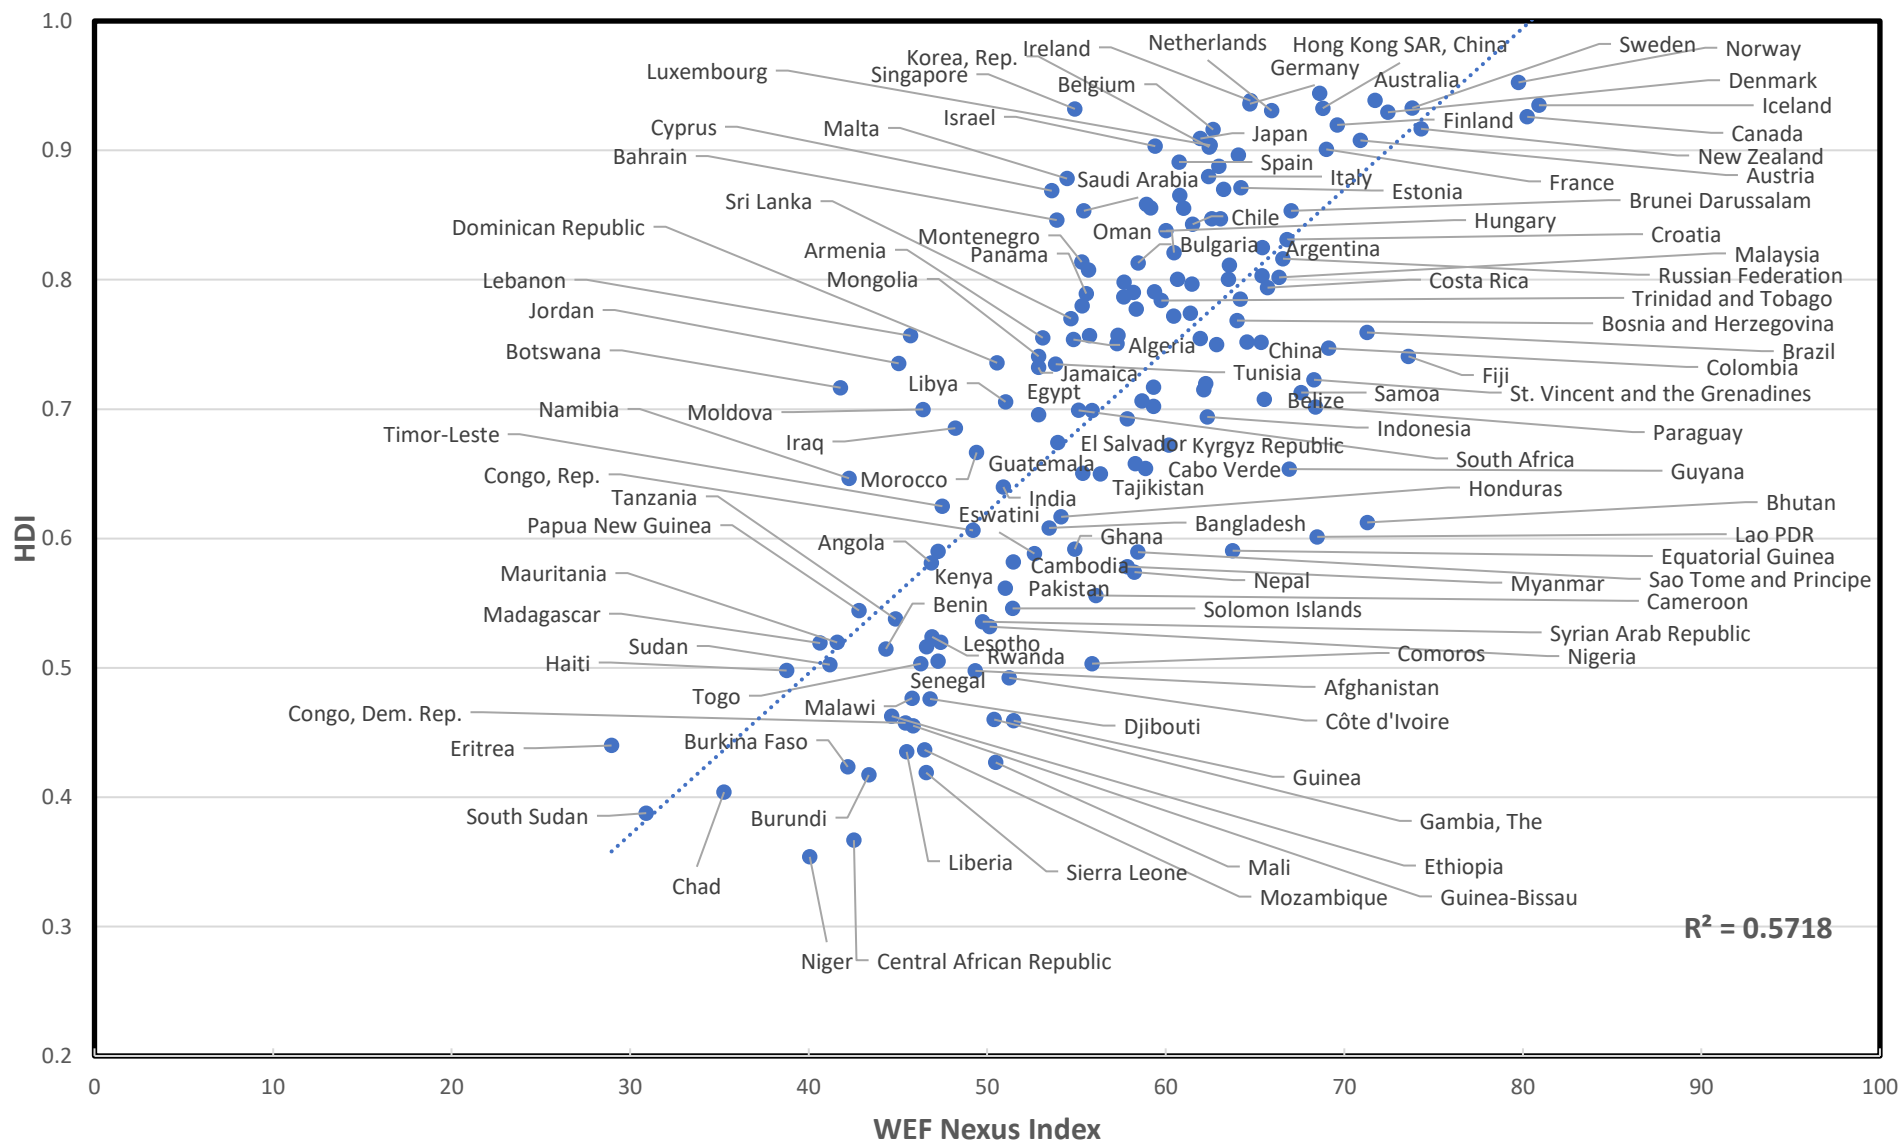

Supplement: Data_Sheet_5.pdf [file Data_Sheet_5.pdf]
