# Supplementary material for: The Water-Energy-Food Nexus Index: A Tool to Support Integrated Resource Planning, Management and Security
Source: Frontiers journal article supplement (doi:10.3389/frwa.2022.825854), 2022-03-10
Supplement: Data_Sheet_3.pdf [file Data_Sheet_3.pdf]

## Addendum C: Conceptual Framework of WEF Nexus Index composition

| Item        | Dimension/indicator | Supra-dimension | Weight | Aggregation | Direction | Name of dimension/indicator                                           |
|-------------|---------------------|-----------------|--------|-------------|-----------|-----------------------------------------------------------------------|
| Index       | Index               |                 | 1      | Arithmetic  | 1         | Water-Energy-Food Nexus Index                                         |
| Pillars     | p.01                | si.01           | 0.333  | Arithmetic  | 1         | Water sub-index                                                       |
|             | p.02                | si.01           | 0.333  | Arithmetic  | 1         | Energy sub-index                                                      |
|             | p.03                | si.01           | 0.333  | Arithmetic  | 1         | Food sub-index                                                        |
| Sub-pillars | sp.01               | p.01            | 0.5    | Arithmetic  | 1         | Access                                                                |
|             | sp.02               | p.01            | 0.5    | Arithmetic  | 1         | Availability                                                          |
|             | sp.03               | p.02            | 0.5    | Arithmetic  | 1         | Access                                                                |
|             | sp.04               | p.02            | 0.5    | Arithmetic  | 1         | Availability                                                          |
|             | sp.05               | p.03            | 0.5    | Arithmetic  | 1         | Access                                                                |
|             | sp.06               | p.03            | 0.5    | Arithmetic  | 1         | Availability                                                          |
| Indicators  | ind.01              | sp.01           | 0.333  | Arithmetic  | 1         | The percentage of people using at least basic drinking water services |
|             | ind.02              | sp.01           | 0.333  | Arithmetic  | 1         | Percentage of people using safely managed sanitation services.        |
|             | ind.03              | sp.01           | 0.333  | Arithmetic  | 1         | Degree of IWRM implementation (1-100)                                 |
|             | ind.04              | sp.02           | 0.25   | Arithmetic  | -1        | Annual freshwater withdrawals, total (% of internal resources)        |
|             | ind.05              | sp.02           | 0.25   | Arithmetic  | 1         | Renewable internal freshwater resources per capita (cubic meters)     |
|             | ind.06              | sp.02           | 0.25   | Arithmetic  | 1         | Environmental flow requirements (106 m3/annum)                        |
|             | ind.07              | sp.02           | 0.25   | Arithmetic  | 1         | Average precipitation in depth (mm per year)                          |
|             | ind.08              | sp.03           | 0.5    | Arithmetic  | 1         | Access to electricity (% of population)                               |
|             | ind.09              | sp.03           | 0.167  | Arithmetic  | 1         | Renewable energy consumption (% of total final energy consumption)    |
|             | ind.10              | sp.03           | 0.167  | Arithmetic  | 1         | Renewable electricity output (% of total electricity output)          |
|             | ind.11              | sp.03           | 0.167  | Arithmetic  | -1        | CO2 emissions (metric tons per capita)                                |
|             | ind.12              | sp.04           | 0.5    | Arithmetic  | 1         | Electric power consumption (kWh per capita)                           |
|             | ind.13              | sp.04           | 0.5    | Arithmetic  | -1        | Energy imports, net (% of energy use)                                 |
|             | ind.14              | sp.05           | 0.333  | Arithmetic  | -1        | Prevalence of undernourishment (%)                                    |
|             | ind.15              | sp.05           | 0.167  | Arithmetic  | -1        | Percentage of children under 5 years of age affected by wasting (%)   |
|             | ind.16              | sp.05           | 0.167  | Arithmetic  | -1        | Percentage of children under 5 years of age who are stunted (%)       |
|             | ind.17              | sp.05           | 0.333  | Arithmetic  | -1        | Prevalence of obesity in the adult population (18 years and older)    |
|             | ind.18              | sp.06           | 0.25   | Arithmetic  | 1         | Average protein supply (gr/caput/day)                                 |
|             | ind.19              | sp.06           | 0.25   | Arithmetic  | 1         | Cereal yield (kg per hectare)                                         |
|             | ind.20              | sp.06           | 0.25   | Arithmetic  | 1         | Average Dietary Energy Supply Adequacy (ADESA) (%)                    |
|             | ind.21              | sp.06           | 0.25   | Arithmetic  | 1         | Average value of food production (I\$ per caput)                      |
